# Supplementary material for: An efficient CRISPR-based strategy to insert small and large fragments of DNA using short homology arms
Source: eLife journal article supplement (doi:10.7554/elife.51539), 2019-11-01
Supplement: supp [file elife-51539-supp-v1.zip]

Archive with 10 entries (10 files):
- elife_poa_e51539_Figure_2_figure_supplement_1.pdf
- elife_poa_e51539_Figure_6_figure_supplement_1.pdf
- elife_poa_e51539_Supplementary_file_2.docx
- elife_poa_e51539_Figure_2_figure_supplement_2.pdf
- elife_poa_e51539_Supplementary_file_1.docx
- elife_poa_e51539_Supplementary_file_3.xlsx
- elife_poa_e51539_Figure_2_figure_supplement_3.pdf
- elife_poa_e51539_Figure_4_figure_supplement_1.pdf
- elife_poa_e51539_Transparent_Reporting_File.docx
- elife_poa_e51539_Video_1.mp4
