# Supplementary material for: An efficient CRISPR-based strategy to insert small and large fragments of DNA using short homology arms
Source: eLife journal article supplement (doi:10.7554/elife.51539), 2019-11-01

Kanca et al. Figure S4. Schematic and crossing scheme for CRISPR gRNA-based dominant marker strategy.

A

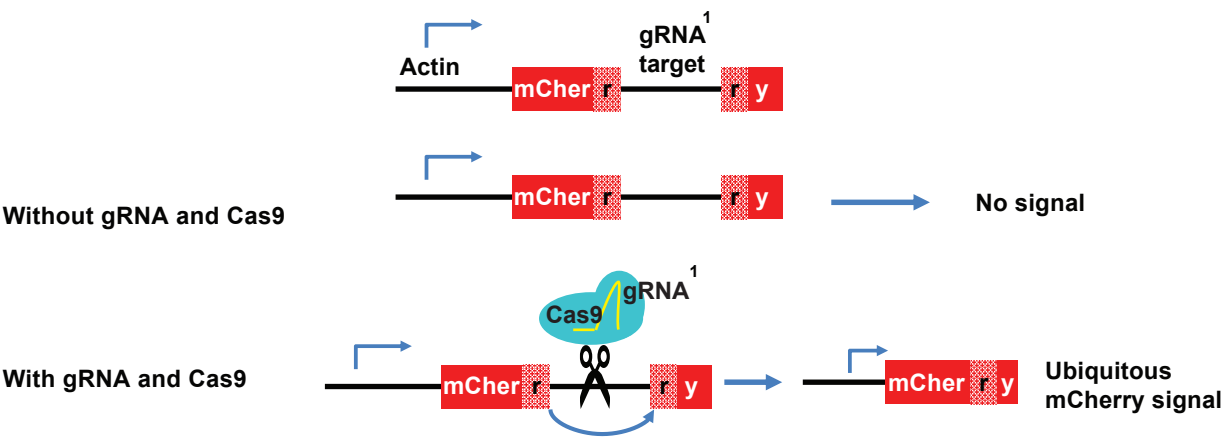

B

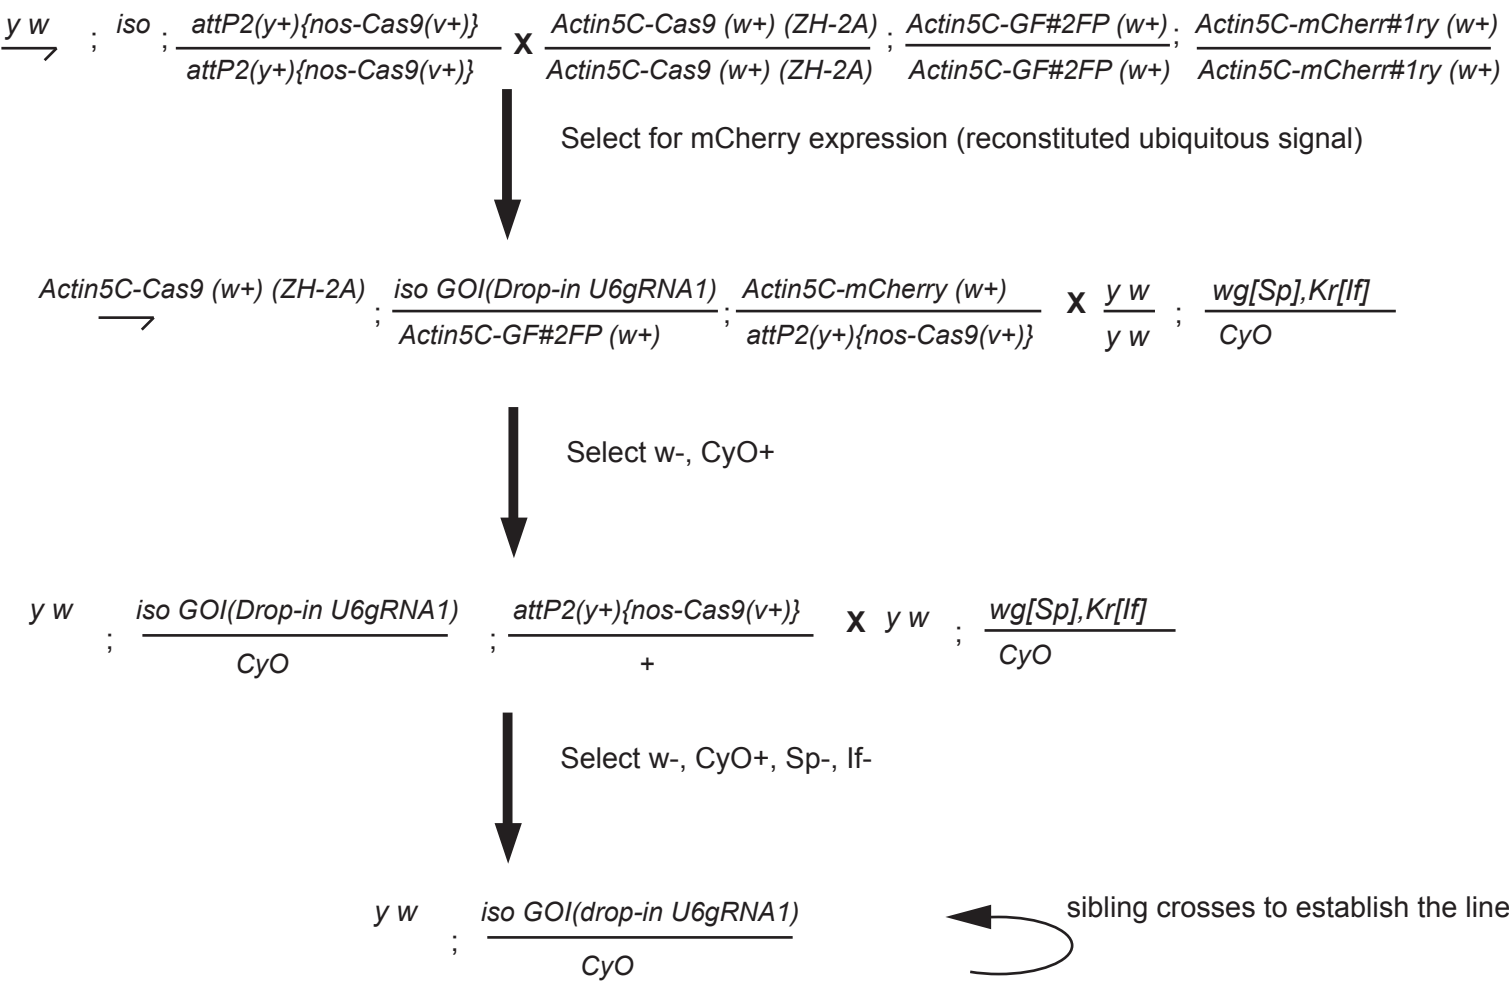

Supplement: supp [file elife-51539-supp-v1.zip › elife_poa_e51539_Figure_4_figure_supplement_1.pdf]
