# Supplementary material for: An efficient CRISPR-based strategy to insert small and large fragments of DNA using short homology arms
Source: eLife journal article supplement (doi:10.7554/elife.51539), 2019-11-01

Kanca et al. FigureS5. Comparison of expression domain obtained by T2A-miniGAL4 and drop-in int100-CRIMIC.

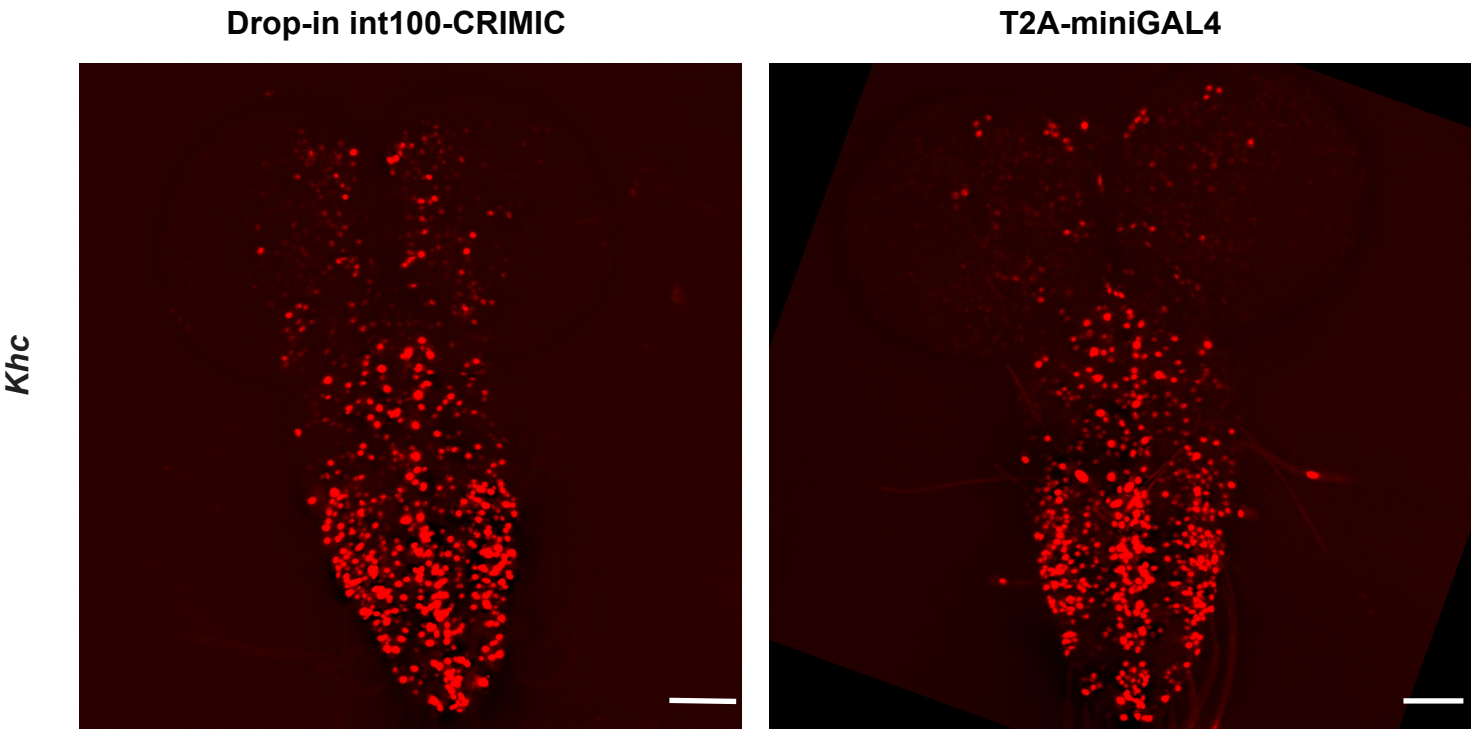

Supplement: supp [file elife-51539-supp-v1.zip › elife_poa_e51539_Figure_6_figure_supplement_1.pdf]
