# Supplementary material for: An efficient CRISPR-based strategy to insert small and large fragments of DNA using short homology arms
Source: eLife journal article supplement (doi:10.7554/elife.51539), 2019-11-01
Supplement: supp [file elife-51539-supp-v1.zip › elife_poa_e51539_Supplementary_file_3.xlsx]

## Sheet: eLife Primers
Name	Targeted Gene	Purpose	Sequence (5'-3')	Notes
arl8_gRNA_rev	arl8	gRNA	AGTGACAAAGGAATTGGTCT	Reversed
arl8_F1	arl8	Flanking primer 1 Forward of 5' end of the gene into the insert	AGCCGGGGGATCAGCTACTA
arl8_R1	arl8	Flanking primer 1 Reverse in the insert	ACCCTGAAGTTCATCTGCAC
arl8_F2	arl8	Flanking primer 2 Forward of insert into the 3' end of the gene	GCATCACCCTGGGCATGGAT
arl8_R2	arl8	Flanking primer 2 Reverse in the 3' end of the gene	CCAGTTTCTTTCACTGCATCCG
arl8_longP_for	arl8	Ultramer forward primer	TAGTTGTCACTTGTGCTGAAATAATAAATTTATGTGGTCAATAACAATTATATATTACGTATGTATAAGGATTTGTGTTAAACAATACTTTGTGCCATCTGAATTCTGTAAAACGACGGCCAGTGG
arl8_longP_rev	arl8	Ultramer reverse primer (Phosphorylated)	TTCTTACACTAGTTAGAAAAAACGCAAGTAGCGTAAGTTATATTCATTGAACCCATTTGATATACTAAATATTAAGATGACCTACTAAGCTACTTCGAAAGCCCCCAGGAAACAGCTATGACGG	Phosphorylated
cnx99_gRNA_for	Calnexin99a	gRNA	CCAGTCATTTATGTTTCTAG
cnx_F1	Calnexin99a	Flanking primer 1 Forward of 5' end of the gene into the insert	CTGTGAGGGTAGGGGAAGGT
cnx_R1	Calnexin99a	Flanking primer 1 Reverse in the insert	GAACGGCCACAAGTTCAGC
cnx_F2	Calnexin99a	Flanking primer 2 Forward of insert into the 3' end of the gene	GCATCACCCTGGGCATGGAT
cnx_R2	Calnexin99a	Flanking primer 2 Reverse in the 3' end of the gene	CTACGAGAGCCCGGTTATCGA
cnx_longP_for	Calnexin99a	Ultramer forward primer	GCTAATCTGTTGCTCCACAGGTTACATCAGAGGTTTATTGAGCAGAGCTTCTATTTAACGTGCTTGTTTCTCTAGAAATTATGCCAGTCATTTATGTTTCGAATTCTGTAAAACGACGGCCAGTGG
cnx_longP_rev	Calnexin99a	Ultramer reverse primer (Phosphorylated)	GAGAGCGCTACACCTGGGCCCGCCAGACTAGTTATAGCTATATAATAACATGTTTTATGTTGCTCTTAGCTTGACCTCATCTGTAGCAGTAACTCCCCTAGCCCCCAGGAAACAGCTATGACGG	Phosphorylated
fibrillarin_gRNA_rev	Fibrillarin	gRNA	AACAAGTCCACCATCTTGAA	Reversed
fib_F1	Fibrillarin	Flanking primer 1 Forward of 5' end of the gene into the insert	ACCTGGATCCGAAGTCTACG
fib_R1	Fibrillarin	Flanking primer 1 Reverse in the insert	GGCCACAAGTTCAGCGTG
fib_F2	Fibrillarin	Flanking primer 2 Forward of insert into the 3' end of the gene	GCCCGATAACCACTACCTGAG
fib_R2	Fibrillarin	Flanking primer 2 Reverse in the 3' end of the gene	AGTACCGCGTGTGGAATCC
fib_longP_for	Fibrillarin	Ultramer forward primer	ATTCCAACTTACGAAATTCCAAAATGCATTACGAAATTACTGACTGAAATTACGAAATTACTCATTTTCCTGTCTAAATATAATATGAGTCAGGCCAATAGAATTCTGTAAAACGACGGCCAGTGG
fib_longP_rev	Fibrillarin	Ultramer reverse primer (Phosphorylated)	AACTATAGTCTTATGAATTCTGATGCTTGCTATCTAGTGTACAAAATACCTTAATATTAATTGAAAACTAATTTGTTTACGAACAACTATACCTGATTGTGCCCCCAGGAAACAGCTATGACGG	Phosphorylated
gMap_gRNA_for	gMap	gRNA	TTGGCAAATCAATTTCGACC
gMap_F1	gMap	Flanking primer 1 Forward of 5' end of the gene into the insert	AACAGACCAACCAGCGACTC
gMap_R1	gMap	Flanking primer 1 Reverse in the insert	ACCCTGAAGTTCATCTGCAC
gMap_F2	gMap	Flanking primer 2 Forward of insert into the 3' end of the gene	GGGCATCGATTTCAAGGAGG
gMap_R2	gMap	Flanking primer 2 Reverse in the 3' end of the gene	CGAAGTTTCATCGTCATTGAGT
gMap_longP_for	gMap	Ultramer forward primer	ACTCCATTCCGCCGCCGGCGGAATCGGACCATGCAAATTGCCGTCCATATTTCCGCATGCCTGGCAGTTCGTCTTATCGCCAGTTGGCAAATCAATTTCGGAATTCTGTAAAACGACGGCCAGTGG
gMap_longP_rev	gMap	Ultramer reverse primer (Phosphorylated)	CCAACCAAAAATAGCAACTGCAGTTAGTCCAAACTGGTGCCAGCAGACCAGGCAAAGGACTCTTATGCAAGAGCACCCAGTGACGATATCCAAACCAGGTGCCCCCAGGAAACAGCTATGACGG	Phosphorylated
golgin245_gRNA_for	Golgin245	gRNA	TGTGTCGGTGAACTGGGAAG
golgin245_F1	Golgin245	Flanking primer 1 Forward of 5' end of the gene into the insert	GCAGTGTGACCGTTGAATGA
golgin245_R1	Golgin245	Flanking primer 1 Reverse in the insert	ACCCTGAAGTTCATCTGCACC
golgin245_F2	Golgin245	Flanking primer 2 Forward of insert into the 3' end of the gene	CCGATAACCACTACCTGAGCA
golgin245_R2	Golgin245	Flanking primer 2 Reverse in the 3' end of the gene	AGTGGCCGAAAAGTCTCCGA
golgin245_longP_for	Golgin245	Ultramer forward primer	GAAGCAGTCGCGGAGCTCCAAGGGCTGCTTAGAATAATGCACAACTGAGGCGAATTCCTATCTATCTACCCTTCTATCCCAAAACAAACAGAACCCAAACGAATTCTGTAAAACGACGGCCAGTGG
golgin245_longP_rev	Golgin245	Ultramer reverse primer (Phosphorylated)	AAAATTATAGCAGAAAGCAAGAAGTAAGTAAGTTGAGTGAAATACAGAGTTGTTTGGATTGTTCAGGTAGCTTCAAATCACTTTTCAAGATGGTGGACTTGCCCCCAGGAAACAGCTATGACGG	Phosphorylated
lam_gRNA_rev	Lamin	gRNA	ATGATATTCCTCACTTTCTG	Reversed
lamin_F1	Lamin	Flanking primer 1 Forward of 5' end of the gene into the insert	TGCTCGATGACACAGCTAGG
lamin_R1	Lamin	Flanking primer 1 Reverse in the insert	CCCTGAAGTTCATCTGCACC
lamin_F2	Lamin	Flanking primer 2 Forward of insert into the 3' end of the gene	GGCATCAAGGCCAACTTCAA
lamin_R2	Lamin	Flanking primer 2 Reverse in the 3' end of the gene	GTATAGCGAGATCGACGGTCG
lamin_longP_for	Lamin	Ultramer forward primer	TAATGATAAAATTAAAAGTAAGAAGAGACAAAAGGCGTGGTTTCAAGCAAGAACGAAACATTCATTTAGTTGCTGAACTGTATATAATGATTATCCCATGGAATTCTGTAAAACGACGGCCAGTGG
lamin_longP_rev	Lamin	Ultramer reverse primer (Phosphorylated)	TCGTACATGCGGACATTGCCTGCGGGTTGGGATAATCAATCAATTAATGTTCGTTAAATGCCAGAATAGGGATGATTTTGTCACAGAAAGTGAGGAATATGCCCCCAGGAAACAGCTATGACGG	Phosphorylated
polo_gRNA_for	polo	gRNA	TAGCTCTCTCCTTTAAGAGC
polo_F1	polo	Flanking primer 1 Forward of 5' end of the gene into the insert	CAAAAGGGGCAGTCCGTAGT
polo_R1	polo	Flanking primer 1 Reverse in the insert	ACCCTGAAGTTCATCTGCACC
polo_F2	polo	Flanking primer 2 Forward of insert into the 3' end of the gene	ATCACTACCAGCAGAACACCC
polo_R2	polo	Flanking primer 2 Reverse in the 3' end of the gene	TGTTACGAGATCATCGATGTGGA
polo_longP_for	polo	Ultramer forward primer	CACCCGCATACACACATATCCATTTCCACATCCCGGTTTTCGTTCCGTTTTCCTTGCTGATGAGCATTCCCTTGTTGTTTTTGTAGCTCTCTCCTTTAAGGAATTCTGTAAAACGACGGCCAGTGG
polo_longP_rev	polo	Ultramer reverse primer (Phosphorylated)	GCGCCAAAAAAAAAAACTGAACAAGCAGCCAACTGCATGAACACACACACACAGGCTCGTACAAGATTCCCACACACAGGCTCTCTTTTTCTCTCCTGCTGCCCCCAGGAAACAGCTATGACGG	Phosphorylated
rab11_gRNA_rev	Rab11	gRNA	TCTTTTCGAAGTAGCTTAGT	Reversed
rab11_F1	Rab11	Flanking primer 1 Forward of 5' end of the gene into the insert	GTTCAATTTGAGTAAGTGTCGAGAA
rab11_R1	Rab11	Flanking primer 1 Reverse in the insert	CCCTGAAGTTCATCTGCACCA
rab11_F2	Rab11	Flanking primer 2 Forward of insert into the 3' end of the gene	CACAACGTGTACATCACCGC
rab11_R2	Rab11	Flanking primer 2 Reverse in the 3' end of the gene	TGGGTTCAATGAATATAACTTACGC
rab11_longP_for	Rab11	Ultramer forward primer	GTGTGCGGGGGCGGGGCGGTGCTTATTGCCGATGAAAAATGCAAATTGAGGAAAACATACGCACACAGACACGGAATTGCATGTGTGTCGGTGAACTGGGGAATTCTGTAAAACGACGGCCAGTGG
rab11_longP_rev	Rab11	Ultramer reverse primer (Phosphorylated)	GGAAAAAAGTCCAAGGAAGACTCATGAGCAGCTGGTCACTTCACTTTTCACTTGTGCACCCAGAAATGGGTCACAATCGCACAATCGAAGGCGACCCCTTGCCCCCAGGAAACAGCTATGACGG	Phosphorylated
ref(2)p_gRNA_rev	Ref2p	gRNA	AACAAAGCAGGGATTCACCT	Reversed
ref2p_F1	Ref2p	Flanking primer 1 Forward of 5' end of the gene into the insert	TGCCCTCCCAGAATTACACC
ref2p_R1	Ref2p	Flanking primer 1 Reverse in the insert	GCAAGCTGACCCTGAAGTTCA
ref2p_F2	Ref2p	Flanking primer 2 Forward of insert into the 3' end of the gene	GCCCGATAACCACTACCTGAG
ref2p_R2	Ref2p	Flanking primer 2 Reverse in the 3' end of the gene	GCCCTCAGTGATTCACCTTTGA
ref2p_longP_for	Ref2p	Ultramer forward primer	TTTCCATACATAACTGCATCCGTCCGAGCAGTGCTGACCATTTAGCTTTTAAGTCTCGTTACTTAAAAACCAGCCCAAATTATTGCGTACTTTGCCCAACGAATTCTGTAAAACGACGGCCAGTGG
ref2p_longP_rev	Ref2p	Ultramer reverse primer (Phosphorylated)	ATAAAAATATATATGTACATATTTATCAGCTAATGTGTCAACACAATTTTGCCAATGATAAGCATTGAGCAGGAATACTATCTAGGTGAATCCCTGCTTTGCCCCCAGGAAACAGCTATGACGG	Phosphorylated
sec23_gRNA_for	Sec23	gRNA	CTAAGATGGCCAACCCCACA
sec23_F1	Sec23	Flanking primer 1 Forward of 5' end of the gene into the insert	TTGAAATTTAAGGGGCGGGTA
sec23_R1	Sec23	Flanking primer 1 Reverse in the insert	ACCCTGAAGTTCATCTGCAC
sec23_F2	Sec23	Flanking primer 2 Forward of insert into the 3' end of the gene	GCATCACCCTGGGCATGGAT
sec23R2	Sec23	Flanking primer 2 Reverse in the 3' end of the gene	GTTGGACCCTTCTAGGTGCT
sec23_longP_for	Sec23	Ultramer forward primer	TAAAAAATCTTTGGAAATTGGATATGTCCTTTGCTCTTGATAGCTATAAGTCCAAAATAAGTGTTTTGGATTTTGCAATAAATCTAAGATGGCCAACCCCGAATTCTGTAAAACGACGGCCAGTGG
sec23_longP_rev	Sec23	Ultramer reverse primer (Phosphorylated)	CAACACCAAAAGCCACTTATATATAAATCATGTTTGAAATTATTAAAAACAATATGAAAAAATAGGAACAGACAAAATCTTTGCTTAGATTAAGCCGTGTGCCCCCAGGAAACAGCTATGACGG	Phosphorylated
spin_gRNA_for	spin	gRNA	TTTGTATTTAATGTGAATTT
spin_F1	spin	Flanking primer 1 Forward of 5' end of the gene into the insert	GCTACTCGCCACTCGGAAAT
spin_R1	spin	Flanking primer 1 Reverse in the insert	CCCTGAAGTTCATCTGCACCA
spin_F2	spin	Flanking primer 2 Forward of insert into the 3' end of the gene	CCGATAACCACTACCTGAGCA
spin_R2	spin	Flanking primer 2 Reverse in the 3' end of the gene	GGCGCACATAGACGTGTGTAT
spin_longP_for	spin	Ultramer forward primer	GGGTCACTTTTTTGCAGTGATTAGATTACCAAGCGATTATTTGTTTAGCTTCTGCTAACTGACTGCTCTGATTGCTTGGCCCTTTTGTATTTAATGTGAAGAATTCTGTAAAACGACGGCCAGTGG
spin_longP_rev	spin	Ultramer reverse primer (Phosphorylated)	TGATACACACGTCTATGTGCGCCAAATAAATATATGCATATGTATGCATGTATTTTTGCTTGTTATATACAACCACACGGAAACGTTGCAAATGCCGAAAGCCCCCAGGAAACAGCTATGACGG	Phosphorylated
Insert_ch_5'_rev		Internal primer in ssDNA drop-in insertion Reverse from 5' end	CCACTGGCCGTCGTTTTACAGAATTC	These primers work for drop-in dsDNA attp-SA-Stop-miniPA-U6-gRNA1-attP and attP-SA-T2A-miniGAL4-miniPA-U6gRNA1-attP as well
Insert_ch_3'_for		Internal primer tin ssDNA drop-in insertion Forward from 3' end	CCGTCATAGCTGTTTCCTGGCGGC	These primers work for drop-in dsDNA attp-SA-Stop-miniPA-U6-gRNA1-attP and attP-SA-T2A-miniGAL4-miniPA-U6gRNA1-attP as well
CRIMIC_ch_rev		Internal primer in CRIMIC and drop-in int100 CRIMIC insertion Reverse from 5' end	GTGGTATGGCTGATTATGATCAGAAG
CRIMIC_ch_for		Internal primer in CRIMIC and drop-in int100 CRIMIC insertion Forward from 3' end	GCGGAAGAGAGATAAATCGGTTG
Acox57D_gRNA_for	Acox57D	gRNA	CACCCCCAGGTGATAACGAA
Acox57D_longP_for	Acox57D	Ultramer	GATCGTGATAGCACTTGTGATATCTACGATTCCCTGCAATTGCAAATAAGCTAATTTTCTTATCAGCTTAAAGGGCTGCTCTACACCCCCAGGTGATAACGAATTCTGTAAAACGACGGCCAGTGG
Acox57D_longP_rev	Acox57D	Ultramer	/5PHOS/TATACAACTTTCAATTATGAACAGAATAAGTGGTAGCAATAAAAGATAGAATCAGTCGTAAAGATAATGGTTCGATTTATAAAGTGTGACTGTGCCCTTCGCCGCCAGGAAACAGCTATGACGG	5' phosphorylated
Acox57_ch_for	Acox57D	Flanking primer Forward from 5' end of the gene	GAGCACAGTGAATCCAGATCTTCAAAAGG
Acox57_ch_rev	Acox57D	Flanking primer Reverse from the 3' end of the gene	CCGATAATGTTGCAGTTCTCCGCC
CG3376_gRNA_for	CG3376	gRNA	CCAGTGGGAAAAATAAAATG
CG3376_longP_for	CG3376	Ultramer	TGTAATCAATCACATATTTTAAGCCATTAGATATTTAAAGCTATTTGATCGTCATTTCGCATTCTCAAAACATACTATTACTGCATAATAACAACCCCATGAATTCTGTAAAACGACGGCCAGTGG
CG3376_longP_rev	CG3376	Ultramer	/5PHOS/GGTGGTGGGGGCCGGCTCTTCAGTCCGATCCTCGGCGCTGTTCGGTCATATGTTTTAGGTTTTTAGTTGTTGCATGGACCACACCAGTGGGAAAAATAAAGCCGCCAGGAAACAGCTATGACGG	5' phosphorylated
CG3376_ch_for	CG3376	Flanking primer Forward from 5' end of the gene	GATGCGGAGTGCAAGAAGAGG
CG3376_ch_rev	CG3376	Flanking primer Reverse from the 3' end of the gene	GCGTTAACGTACACTAAGCGAAATGG
CG5009_gRNA_for	CG5009	gRNA	ATGTACATGTAGGTCTGTCG
CG5009_longP_for	CG5009	Ultramer	GTGGGCCGGCGGCGAGGAGCGATTCAAGGAGAAGAAGGCCCTGGGTGAGTTAGCTTAGAAGGGAAAAACACCGGATTTCAAGCTTCTCCGGTGACCCCGAGAATTCTGTAAAACGACGGCCAGTGG
CG5009_longP_rev	CG5009	Ultramer	/5PHOS/TTTGGCACAATTTCTTGCATCCACTGTTGGGAAACGCGATTGCGCCAAGCTCAGATAAAGCTCTGAGCGACCGGTTAATGTGAATGTACATGTAGGTCTGGCCGCCAGGAAACAGCTATGACGG	5' phosphorylated
CG5009_ch_for	CG5009	Flanking primer Forward from 5' end of the gene	GGAATAGCTGGATCAGATCAGCAG
CG5009_ch_rev	CG5009	Flanking primer Reverse from the 3' end of the gene	GTTAATTCGCGGGAGTTACTGGG
CG9527_gRNA_for	CG9527	gRNA	CGGGCGACGATTAGACCGGG	Reversed
CG9527_longP_for	CG9527	Ultramer	CGTTACCATTTCCAGTTTGTTACATATGTACATGGTCAGCGGGGTCGAAGTGCAGACTGCCTCGATAGCTTTTGTCGGAGCTGCAGGCCGCCAACCGCCCGAATTCTGTAAAACGACGGCCAGTGG
CG9527_longP_rev	CG9527	Ultramer	/5PHOS/GGGTGCTGTTCCATCCATTGCCACACCTTGTGCTAAAGACGGAGTGACATGTAAACGAATTACTCAAGTGTGCAGATAAGAAACGGGCGACGATTAGACCGCCGCCAGGAAACAGCTATGACGG	5' phosphorylated
CG9527_ch_for	CG9527	Flanking primer Forward from 5' end of the gene	CGCCTCGACTGACGACC
CG9527_ch_rev	CG9527	Flanking primer Reverse from the 3' end of the gene	GATAAACTCCTGCCTTTTCACATCG
CG17544_gRNA_for	CG17544	gRNA	AAGCTGTCACGTAAGACTGCTGG	Reversed
CG17544_longP_for	CG17544	Ultramer	AGCGATTGCGACTGATATTCGAGAAGGAGCAGGGATTGCGAATTAAGGTAAGTGGATGGCTATCTCTTAGAAAGAGAACGTGCTGGAATATCTTCCAGCAGAATTCTGTAAAACGACGGCCAGTGG
CG17544_longP_rev	CG17544	Ultramer	/5PHOS/GTACGTAACAACTACTTATTGGATAATGCCATCAATTTACTTTCGAGACTCTAAAGACATTAGCCATAATTCAGCGATTTGATAAGCTGTCACGTAAGACGCCGCCAGGAAACAGCTATGACGG	5' phosphorylated
CG17544_ch_for	CG17544	Flanking primer Forward from 5' end of the gene	CAGCACCTCTTGAGGGTTTTCC
CG17544_ch_rev	CG17544	Flanking primer Reverse from the 3' end of the gene	GACGCCACACTTTGTACTACGAAAAAGG
Cp1_gRNA_for	Cp1	gRNA	AGAGACCTCCTCTCCCAGCT
Cp1_longP_for	Cp1	Ultramer	CTTTCAATTCCCTTTATAGCTATCATTTGTTTAGCGTTCGTGCTATTTTCGTGCTGTGGCTGTGTCAATATGCGGGTCGGACTAACAAACAACCCCGAGCGAATTCTGTAAAACGACGGCCAGTGG
Cp1_longP_rev	Cp1	Ultramer	/5PHOS/GAGCCAAACTGCAGGTAGGAATAGGAGAAGCGAGGCCAGCACGAGGAAATGCGCTCCATCTGCCTGCAGTGGTCCCGTGGATAAGAGACCTCCTCTCCCAGCCGCCAGGAAACAGCTATGACGG	5' phosphorylated
Cp1_ch_for	Cp1	Flanking primer Forward from 5' end of the gene	CAAAATCTACTAAGACTTGTGGTGAGCC
Cp1_ch_rev	Cp1	Flanking primer Reverse from the 3' end of the gene	CTGATAGTTCTTGCGGTGCTCC
endoB_gRNA_for	endoB	gRNA	GTGGTGAACTTTCGGTGGTT	Reversed
endoB_longP_for	endoB	Ultramer	GTGAAGGAGGCGGGCAGCACAATATCACGAGTGGTGCAGGTGAACAAATCAATGAATTTGGGTGGCTGAAAAAAAAGCGGGTGGTGGTGAACTTTCGGTGGAATTCTGTAAAACGACGGCCAGTGG
endoB_longP_rev	endoB	Ultramer	/5PHOS/CTGAAAAGGTCATTGAAAACAATGGAGAGCCGTTGAAAAGGGCAAAGAAACAACGAAAGTGCTTGAGATTGGTTTGGGGTACATCTGTCATTTGCCCAACGCCGCCAGGAAACAGCTATGACGG	5' phosphorylated
endoB_ch_for	endoB	Flanking primer Forward from 5' end of the gene	GTCGTGGCATTTGTTTAATAGAAGTAAATTTCG
endoB_ch_rev	endoB	Flanking primer Reverse from the 3' end of the gene	CCTTGCCAATTGTCTTCATTTCGCC
Khc_gRNA_for	Khc	gRNA	ACTCATTGGCGCGCGGACAG	Reversed
khc_longP_for	Khc	Ultramer	TTCTAGTTTCCAGTCCGCCTTCAGTGCTTACCTCACTTACATTTCCACACAAACACATACACACATTGACGGTAGCCCCCGCTCCACTTCCACTCCCCTGGAATTCTGTAAAACGACGGCCAGTGG
khc_longP_rev	Khc	Ultramer	/5PHOS/AATACAGCCAAATTCCATTGCCTCCAAAGTTGCTCTTATTGTTTTTCCTCATATTTTTTTTTTTTGTATGCTTTGCGTGCATGACTCATTGGCGCGCGGAGCCGCCAGGAAACAGCTATGACGG	5' phosphorylated
Khc_ch_for	Khc	Flanking primer Forward from 5' end of the gene	GCGTACATTACCCTTCCCCAAAATTG
Khc_ch_rev	Khc	Flanking primer Reverse from the 3' end of the gene	GCTATAAACTGGTGTCAGTTGCGG
Lst_gRNA_for	Lst	gRNA	GTTGCGTTTCATGTGGTTCA	Reversed
Lst_longP-rev	Lst	Ultramer	TTAACCGCAGTCAAAAACAAATTAATTACAATCGGCGGCGGGGCAAAAGGAGAAGATCGAGATCGAGGTGGAGACTGTAACCGGTTGCGTTTCATGTGGTGCCGCCAGGAAACAGCTATGACGG
Lst_longP_for	Lst	Ultramer	/5PHOS/CTCATCCGCTCATCCGCTCATCCGCAGCTCATCCGCAGCTCATCCATCCTGCTGGTGGAGCCTTGATACCGTTTACAAAGTCGAGCTCTCTTAACCCTGAGAATTCTGTAAAACGACGGCCAGTGG	5' phosphorylated
Lst_ch_for	Lst	Flanking primer Forward from 5' end of the gene	CCAAAACACAACACAGGCCAAC
Lst_ch_rev	Lst	Flanking primer Reverse from the 3' end of the gene	GTCATCGTTGTCGCCAGAATG
Nlaz_gRNA_for	Nlaz	gRNA	CATTCTGATAGATTTAGAAT	Reversed
Nlaz_longP_for	Nlaz	Ultramer	TGTTAAGCTACTGGACACCTTCGACGCGGAAGCGGTGAGTTCTGACCTTAGGCCAACCATCTCGCATCGCATGTTAATCATGTCATTCTGATAGATTTAGGAATTCTGTAAAACGACGGCCAGTGG
NLaz_longP_rev	Nlaz	Ultramer	/5PHOS/TATATACCCTTATATTTAAATTTTAGTTCATAACTATTGAGACTTTGAAGTGCCTTTATTGGCATGTTCGCTTGCAACTGATCGTTTAGACTTTCCTATTGCCGCCAGGAAACAGCTATGACGG	5' phosphorylated
Nlaz_ch_for	Nlaz	Flanking primer Forward from 5' end of the gene	GATTCGGCGCACTCGAAAAG
NLaz_ch_rev	Nlaz	Flanking primer Reverse from the 3' end of the gene	CGATCTCGAAAGCAAATGGATAGGC
3XPEGFP_for_RI		Primer to clone attP-3XP3EGFP-attP scaffold vector	ATTAGAATTCTGTAAAACGACGGCCAGTGGAGTAGTGCCCCAACTGGGGTAACCTTTGAGTTCTCTCAGTTGGGGGCGTAGGGGATCTAATTCAATTAGAGACTAATTCAATTAGAGCTAATTCAATTAGG
3XPEGFP_rev-NotI		Primer to clone attP-3XP3EGFP-attP scaffold vector	TAATGCGGCCGCCAGGAAACAGCTATGACGGAGTAGTGCCCCAACTGGGGTAACCTTTGAGTTCTCTCAGTTGGGGGCGTAGGAACTTGTTTATTGCAGCTTATAATGGTTACAAATAAAGC
M13For-attPfor-SbfI-AvrII-attPrev-M13rev_for		Ultramers to clone pScaffold	AATTCTGTAAAACGACGGCCAGTGGAGTAGTGCCCCAACTGGGGTAACCTTTGAGTTCTCTCAGTTGGGGGCGTAGGCCTGCAGGAATTATATCCTAGGGCGGCCGCCCTACGCCCCCAACTGAGAGAACTCAAAGGTTACCCCAGTTGGGGCACTACTCCGTCATAGCTGTTTCCTGGG
M13For-attPfor-SbfI-AvrII-attPrev-M13rev_rev		Ultramers to clone pScaffold	GGCCCCCAGGAAACAGCTATGACGGAGTAGTGCCCCAACTGGGGTAACCTTTGAGTTCTCTCAGTTGGGGGCGTAGGGCGGCCGCCCTAGGATATAATTCCTGCAGGCCTACGCCCCCAACTGAGAGAACTCAAAGGTTACCCCAGTTGGGGCACTACTCCACTGGCCGTCGTTTTACAG
SA_for_SbfI		Primers to clone attP-SA-Linker-sfGFP-Linker-SD-attP	ATTACCTGCAGGAGTCGATCCAACATGGCGACTTG
Linker_SA_rev_BamHI		Primers to clone attP-SA-Linker-sfGFP-Linker-SD-attP	TAATGGATCCGCCGCTACCTCC
sfGFP_for_BamHI		Primers to clone attP-SA-Linker-sfGFP-Linker-SD-attP	ATTAGGATCCATGGTGTCCAAGGGCGAGG
sfGFP_rev_KpnI		Primers to clone attP-SA-Linker-sfGFP-Linker-SD-attP	TAATGGTACCCTTGTACAGCTCATCCATGCCC
Linker_SD_for_KpnI		Primers to clone attP-SA-Linker-sfGFP-Linker-SD-attP	ATTAGGTACCGGATCCGGAGGTAGCGGTG
Linker_SD_rev_NotI		Primers to clone attP-SA-Linker-sfGFP-Linker-SD-attP	TAATGCGGCCGCAGAAGTTCAAATGGGCTTTCATATTTACTTTTTTCTC

## Sheet: S2 cells donors
Supplementary Table 1: sfGFP Scaffold Sequences and Associated Genes
Insert Phase	Genes with this Phase	gRNA target sequence	Ultramer Primer Sequence (forward)	Ultramer Primer Sequence (reverse) 5' Phosphorylated	Insert Sequence
pScaffold_sfGFP_GT_p0
	arl8	agaccaattcctttgtcactggg	tagttgtcacttgtgctgaaataataaatttatgtggtcaataacaattatatattacgtatgtataaggatttgtgttaaacaatactttgtgccatctgaattctgtaaaacgacggccagtgg	ttcttacactagttagaaaaaacgcaagtagcgtaagttatattcattgaacccatttgatatactaaatattaagatgacctactaagctacttcgaaagcccccaggaaacagctatgacgg
	fib	ttcaagatggtggacttgtttgg	attccaacttacgaaattccaaaatgcattacgaaattactgactgaaattacgaaattactcattttcctgtctaaatataatatgagtcaggccaatagaattctgtaaaacgacggccagtgg	aactatagtcttatgaattctgatgcttgctatctagtgtacaaaataccttaatattaattgaaaactaatttgtttacgaacaactatacctgattgtgcccccaggaaacagctatgacgg	aagcttgggctgcaggtcgactctagaggatccccgggcgagctcgaattctgtaaaacgacggccagtggagtagtgccccaactggggtaacctttgagttctctcagttgggggcgtaggcctgcaggagtcgatccaacatggcgacttgtcccatccccggcatgtttaaatatactaattattcttgaactaattttaatcaaccgatttatctctcttccgcaggtgggaggttccggtggaagcggaggtagcggcggatccatggtgtccaagggcgaggagctgttcaccggcgtggtgcccatcctggtggagctggatggcgacgtgaacggccacaagttcagcgtgcgcggcgagggcgagggcgacgccaccaacggcaagctg…
	calnexin99a	ccagtcatttatgtttctagggg	gctaatctgttgctccacaggttacatcagaggtttattgagcagagcttctatttaacgtgcttgtttctctagaaattatgccagtcatttatgtttcgaattctgtaaaacgacggccagtgg	gagagcgctacacctgggcccgccagactagttatagctatataataacatgttttatgttgctcttagcttgacctcatctgtagcagtaactcccctagcccccaggaaacagctatgacgg
	dLBR	cttagcccggaatttccttatgg	aaatttcgagcttctgtttctgtgtgttttatgaagctgataagcagcacccaccgccctgcttatcagcttagagttctgccctcatatgctaccataagAATTCTGTAAAACGACGGCCAGTGG	ttaaaggtgttttgagtacacttatcagattcccctctatttttgtaatcagcagtttagctcaacaattacaaatccgttatcttagcccggaatttccgccCCCAGGAAACAGCTATGACGG
	golgin245	tgtgtcggtgaactgggaagggg	gaagcagtcgcggagctccaagggctgcttagaataatgcacaactgaggcgaattcctatctatctacccttctatcccaaaacaaacagaacccaaacgaattctgtaaaacgacggccagtgg	aaaattatagcagaaagcaagaagtaagtaagttgagtgaaatacagagttgtttggattgttcaggtagcttcaaatcacttttcaagatggtggacttgcccccaggaaacagctatgacgg
	pfk	tttgttagggaacttctggccgg	gcgatttcgatttcggctaatttgtttcgtttttttgttgtcgctcttggtttctattcggtttatttaaatgagttctttaatttgttagggaacttctgAATTCTGTAAAACGACGGCCAGTGG	cccccaagaaattgaaatcaaatgaatagattttaatcaatttaaattggctagcaattgacacattttttgcatattttcgagggaccaacggccggccgccCCCAGGAAACAGCTATGACGG
	polo	tagctctctcctttaagagcagg	cacccgcatacacacatatccatttccacatcccggttttcgttccgttttccttgctgatgagcattcccttgttgtttttgtagctctctcctttaaggaattctgtaaaacgacggccagtgg	gcgccaaaaaaaaaaactgaacaagcagccaactgcatgaacacacacacacaggctcgtacaagattcccacacacaggctctctttttctctcctgctgcccccaggaaacagctatgacgg
	rab5	gagttaagaatattgaactgagg	GAACTGCATAAACAAgtgagtgtcagcggggaaacttgaatatcgtgcagagtgttttaatattataatcatttatattattgctcatgaagtgcctcaggAATTCTGTAAAACGACGGCCAGTGG	AATGTTTGGTGAGGCctggaaaaaagttttattaatacatattttatgtaatataatttacgtatcaagtgaacgaatttctcgagttaagaatattgaagccCCCAGGAAACAGCTATGACGG
	rab11	actaagctacttcgaaaagatgg	gtgtgcgggggcggggcggtgcttattgccgatgaaaaatgcaaattgaggaaaacatacgcacacagacacggaattgcatgtgtgtcggtgaactggggaattctgtaaaacgacggccagtgg	ggaaaaaagtccaaggaagactcatgagcagctggtcacttcacttttcacttgtgcacccagaaatgggtcacaatcgcacaatcgaaggcgaccccttgcccccaggaaacagctatgacgg
	sec23	ctaagatggccaaccccacacgg	taaaaaatctttggaaattggatatgtcctttgctcttgatagctataagtccaaaataagtgttttggattttgcaataaatctaagatggccaaccccgaattctgtaaaacgacggccagtgg	caacaccaaaagccacttatatataaatcatgtttgaaattattaaaaacaatatgaaaaaataggaacagacaaaatctttgcttagattaagccgtgtgcccccaggaaacagctatgacgg
pScaffold_sfGFP_GT_p1
	lamin	cagaaagtgaggaatatcatggg	taatgataaaattaaaagtaagaagagacaaaaggcgtggtttcaagcaagaacgaaacattcatttagttgctgaactgtatataatgattatcccatggaattctgtaaaacgacggccagtgg	tcgtacatgcggacattgcctgcgggttgggataatcaatcaattaatgttcgttaaatgccagaatagggatgattttgtcacagaaagtgaggaatatgcccccaggaaacagctatgacgg	aagcttgggctgcaggtcgactctagaggatccccgggcgagctcgaattctgtaaaacgacggccagtggagtagtgccccaactggggtaacctttgagttctctcagttgggggcgtaggcctgcaggagtcgatccaacatggcgacttgtcccatccccggcatgtttaaatatactaattattcttgaactaattttaatcaaccgatttatctctcttccgcaggtggcggaggttccggtggaagcggaggtagcggcggatccatggtgtccaagggcgaggagctgttcaccggcgtggtgcccatcctggtggagctggatggcgacgtgaacggccacaagttcagcgtgcgcggcgagggcgagggcgacgccaccaacggcaagc…
	ref2p	aggtgaatccctgctttgttggg	tttccatacataactgcatccgtccgagcagtgctgaccatttagcttttaagtctcgttacttaaaaaccagcccaaattattgcgtactttgcccaacgaattctgtaaaacgacggccagtgg	ataaaaatatatatgtacatatttatcagctaatgtgtcaacacaattttgccaatgataagcattgagcaggaatactatctaggtgaatccctgctttgcccccaggaaacagctatgacgg
	sec71	ataaaatatttcttatcggatgg	ttaagctgaagttgcttattattctacttaactcgcttagatttaactatttttcaatattttcaagaaacgtaattaagttcataaaatatttcttatcgAATTCTGTAAAACGACGGCCAGTGG	attttcgcgcaatgataattagacggtttggaggagtggaattttatgttggaccttatcgtatcgtactgtaaatgattcatacaattttttcccatccgccCCCAGGAAACAGCTATGACGG
	spin	tttgtatttaatgtgaatttcgg	gggtcacttttttgcagtgattagattaccaagcgattatttgtttagcttctgctaactgactgctctgattgcttggcccttttgtatttaatgtgaagaattctgtaaaacgacggccagtgg	tgatacacacgtctatgtgcgccaaataaatatatgcatatgtatgcatgtatttttgcttgttatatacaaccacacggaaacgttgcaaatgccgaaagcccccaggaaacagctatgacgg
	tim17b	ggacacaatcagttgcctggagg	tcgggaccactatacggtttcccctcagcagaagtgagccaattgctgagagaccattacgaaacgggtaatagttccggctgccaggagtcatcctccagAATTCTGTAAAACGACGGCCAGTGG	ctacgcctcgtacagagctccatcccaaagtctatgggaatccttgaaatggtagacttctcggcgcaggactaagaagttatggacacaatcagttgccgccCCCAGGAAACAGCTATGACGG
pScaffold_sfGFP_GT_p2
	gMap	ttggcaaatcaatttcgacctgg	actccattccgccgccggcggaatcggaccatgcaaattgccgtccatatttccgcatgcctggcagttcgtcttatcgccagttggcaaatcaatttcggaattctgtaaaacgacggccagtgg	ccaaccaaaaatagcaactgcagttagtccaaactggtgccagcagaccaggcaaaggactcttatgcaagagcacccagtgacgatatccaaaccaggtgcccccaggaaacagctatgacgg	aagcttgggctgcaggtcgactctagaggatccccgggcgagctcgaattctgtaaaacgacggccagtggagtagtgccccaactggggtaacctttgagttctctcagttgggggcgtaggcctgcaggagtcgatccaacatggcgacttgtcccatccccggcatgtttaaatatactaattattcttgaactaattttaatcaaccgatttatctctcttccgcaggtcgggaggttccggtggaagcggaggtagcggcggatccatggtgtccaagggcgaggagctgttcaccggcgtggtgcccatcctggtggagctggatggcgacgtgaacggccacaagttcagcgtgcgcggcgagggcgagggcgacgccaccaacggcaagct…
	pmp70	ttagttggccgtatttacaaagg	tggagattttgagcagtccaattgtctgccatccacaaagatcaaacatatgtattattatatctatatatctatagagggcaaacagaaagaacctttggAATTCTGTAAAACGACGGCCAGTGG	atgaagatagcatattaaaagtgtttgtaactaagctatatgtcgtttgaagcaataaaatatgagagaaattaataactctattagttggccgtatttagccCCCAGGAAACAGCTATGACGG
	seipin	catggactgataagcagattagg	cgaatgtgaaggaaatcgatgtggctacaggttttcttcctgtgccatgtacatttatctaaatataggccatttgtccataaatatatgtagacctaatgAATTCTGTAAAACGACGGCCAGTGG	gttttattgggcactaagtctagagcggctaactatgaatcaaacaacttgacaattaccaactagcttgcaatagccaatcgcatggactgataagcaggccCCCAGGAAACAGCTATGACGG
	tom20	gtgttgctgcttattgcctcagg	aaacaaacaagcccacatatgtttctccagccaaatcgatgtacatattttatgtggagtcccattacacttgcgtgttcatcgtgttgctgcttattgcgAATTCTGTAAAACGACGGCCAGTGG	tatattcaaattatgaatttcttggcaggaagcctgctgagaatccaaacactgaaatgtgcttgttaatccaaggcagtggagtctttagatgcctgaggccCCCAGGAAACAGCTATGACGG

## Sheet: Synthesized donors
Synthesized donors
gRNA1target-LHA-attP-SA-3XSTOP-minipolyA-U6gRNA1-attP-RHA-gRNA1target
Acox57D_SA-STOP_2XgRNA1	Acox57D		GTAGTACGATCATAACAACGCGGGATCGTGATAGCACTTGTGATATCTACGATTCCCTGCAATTGCAAATAAGCTAATTTTCTTATCAGCTTAAAGGGCTGCTCTACACCCCCAGGTGATAACGGAGTAGTGCCCCAACTGGGGTAACCTTTGAGTTCTCTCAGTTGGGGGCGTAGGCCTGCAGGAGTCGATCCAACATGGCGACTTGTCCCATCCCCGGCATGTTTAAATATACTAATTATTCTTGAACTAATTTTAATCAACCGATTTATCTCTCTTCCGCAGGTTAACGTAACCTAGGAAATAAAATACGAAATGAATTCTACCCAAAAGCAGAGAGGGCGCCAGTGCTCACTACTTTTTATAATTCTCAACTTCTTTTTCCAGACTCAGTTCGTA…
CG3376_SA-STOP_2XgRNA1	CG3376		GTAGTACGATCATAACAACGCGGTGTAATCAATCACATATTTTAAGCCATTAGATATTTAAAGCTATTTGATCGTCATTTCGCATTCTCAAAACATACTATTACTGCATAATAACAACCCCATGGAGTAGTGCCCCAACTGGGGTAACCTTTGAGTTCTCTCAGTTGGGGGCGTAGGCCTGCAGGAGTCGATCCAACATGGCGACTTGTCCCATCCCCGGCATGTTTAAATATACTAATTATTCTTGAACTAATTTTAATCAACCGATTTATCTCTCTTCCGCAGGTTAACGTAACCTAGGAAATAAAATACGAAATGAATTCTACCCAAAAGCAGAGAGGGCGCCAGTGCTCACTACTTTTTATAATTCTCAACTTCTTTTTCCAGACTCAGTTCGTA…
CG5009_SA-STOP_2XgRNA1	CG5009		GTAGTACGATCATAACAACGCGGGTGGGCCGGCGGCGAGGAGCGATTCAAGGAGAAGAAGGCCCTGGGTGAGTTAGCTTAGAAGGGAAAAACACCGGATTTCAAGCTTCTCCGGTGACCCCGAGGAGTAGTGCCCCAACTGGGGTAACCTTTGAGTTCTCTCAGTTGGGGGCGTAGGCCTGCAGGAGTCGATCCAACATGGCGACTTGTCCCATCCCCGGCATGTTTAAATATACTAATTATTCTTGAACTAATTTTAATCAACCGATTTATCTCTCTTCCGCAGGTTAACGTAACCTAGGAAATAAAATACGAAATGAATTCTACCCAAAAGCAGAGAGGGCGCCAGTGCTCACTACTTTTTATAATTCTCAACTTCTTTTTCCAGACTCAGTTCGTA…
CG9527_SA-STOP_2XgRNA1	CG9527		GTAGTACGATCATAACAACGCGGCGTTACCATTTCCAGTTTGTTACATATGTACATGGTCAGCGGGGTCGAAGTGCAGACTGCCTCGATAGCTTTTGTCGGAGCTGCAGGCCGCCAACCGCCCGGAGTAGTGCCCCAACTGGGGTAACCTTTGAGTTCTCTCAGTTGGGGGCGTAGGCCTGCAGGAGTCGATCCAACATGGCGACTTGTCCCATCCCCGGCATGTTTAAATATACTAATTATTCTTGAACTAATTTTAATCAACCGATTTATCTCTCTTCCGCAGGTTAACGTAACCTAGGAAATAAAATACGAAATGAATTCTACCCAAAAGCAGAGAGGGCGCCAGTGCTCACTACTTTTTATAATTCTCAACTTCTTTTTCCAGACTCAGTTCGTA…
CG17544_SA-STOP_2XgRNA1	CG17544		GTAGTACGATCATAACAACGCGGAGCGATTGCGACTGATATTCGAGAAGGAGCAGGGATTGCGAATTAAGGTAAGTGGATGGCTATCTCTTAGAAAGAGAACGTGCTGGAATATCTTCCAGCAGGAGTAGTGCCCCAACTGGGGTAACCTTTGAGTTCTCTCAGTTGGGGGCGTAGGCCTGCAGGAGTCGATCCAACATGGCGACTTGTCCCATCCCCGGCATGTTTAAATATACTAATTATTCTTGAACTAATTTTAATCAACCGATTTATCTCTCTTCCGCAGGTTAACGTAACCTAGGAAATAAAATACGAAATGAATTCTACCCAAAAGCAGAGAGGGCGCCAGTGCTCACTACTTTTTATAATTCTCAACTTCTTTTTCCAGACTCAGTTCGTA…
Cp1_SA-STOP_2XgRNA1	Cp1		GTAGTACGATCATAACAACGCGGCTTTCAATTCCCTTTATAGCTATCATTTGTTTAGCGTTCGTGCTATTTTCGTGCTGTGGCTGTGTCAATATGCGGGTCGGACTAACAAACAACCCCGAGCGGAGTAGTGCCCCAACTGGGGTAACCTTTGAGTTCTCTCAGTTGGGGGCGTAGGCCTGCAGGAGTCGATCCAACATGGCGACTTGTCCCATCCCCGGCATGTTTAAATATACTAATTATTCTTGAACTAATTTTAATCAACCGATTTATCTCTCTTCCGCAGGTTAACGTAACCTAGGAAATAAAATACGAAATGAATTCTACCCAAAAGCAGAGAGGGCGCCAGTGCTCACTACTTTTTATAATTCTCAACTTCTTTTTCCAGACTCAGTTCGTA…
endoB_SA-STOP_2XgRNA1	endoB		GTAGTACGATCATAACAACGCGGGTGAAGGAGGCGGGCAGCACAATATCACGAGTGGTGCAGGTGAACAAATCAATGAATTTGGGTGGCTGAAAAAAAAGCGGGTGGTGGTGAACTTTCGGTGGGAGTAGTGCCCCAACTGGGGTAACCTTTGAGTTCTCTCAGTTGGGGGCGTAGGCCTGCAGGAGTCGATCCAACATGGCGACTTGTCCCATCCCCGGCATGTTTAAATATACTAATTATTCTTGAACTAATTTTAATCAACCGATTTATCTCTCTTCCGCAGGTTAACGTAACCTAGGAAATAAAATACGAAATGAATTCTACCCAAAAGCAGAGAGGGCGCCAGTGCTCACTACTTTTTATAATTCTCAACTTCTTTTTCCAGACTCAGTTCGTA…
Khc_SA-STOP_2XgRNA1	Khc		GTAGTACGATCATAACAACGCGGTTCTAGTTTCCAGTCCGCCTTCAGTGCTTACCTCACTTACATTTCCACACAAACACATACACACATTGACGGTAGCCCCCGCTCCACTTCCACTCCCCTGGGAGTAGTGCCCCAACTGGGGTAACCTTTGAGTTCTCTCAGTTGGGGGCGTAGGCCTGCAGGAGTCGATCCAACATGGCGACTTGTCCCATCCCCGGCATGTTTAAATATACTAATTATTCTTGAACTAATTTTAATCAACCGATTTATCTCTCTTCCGCAGGTTAACGTAACCTAGGAAATAAAATACGAAATGAATTCTACCCAAAAGCAGAGAGGGCGCCAGTGCTCACTACTTTTTATAATTCTCAACTTCTTTTTCCAGACTCAGTTCGTA…
Lst_SA-STOP_2XgRNA1	Lst		GTAGTACGATCATAACAACGCGGCTCATCCGCTCATCCGCTCATCCGCAGCTCATCCGCAGCTCATCCATCCTGCTGGTGGAGCCTTGATACCGTTTACAAAGTCGAGCTCTCTTAACCCTGAGGAGTAGTGCCCCAACTGGGGTAACCTTTGAGTTCTCTCAGTTGGGGGCGTAGGCCTGCAGGAGTCGATCCAACATGGCGACTTGTCCCATCCCCGGCATGTTTAAATATACTAATTATTCTTGAACTAATTTTAATCAACCGATTTATCTCTCTTCCGCAGGTTAACGTAACCTAGGAAATAAAATACGAAATGAATTCTACCCAAAAGCAGAGAGGGCGCCAGTGCTCACTACTTTTTATAATTCTCAACTTCTTTTTCCAGACTCAGTTCGTA…
NLaz_SA-STOP_2XgRNA1	Nlaz		GTAGTACGATCATAACAACGCGGTGTTAAGCTACTGGACACCTTCGACGCGGAAGCGGTGAGTTCTGACCTTAGGCCAACCATCTCGCATCGCATGTTAATCATGTCATTCTGATAGATTTAGGGAGTAGTGCCCCAACTGGGGTAACCTTTGAGTTCTCTCAGTTGGGGGCGTAGGCCTGCAGGAGTCGATCCAACATGGCGACTTGTCCCATCCCCGGCATGTTTAAATATACTAATTATTCTTGAACTAATTTTAATCAACCGATTTATCTCTCTTCCGCAGGTTAACGTAACCTAGGAAATAAAATACGAAATGAATTCTACCCAAAAGCAGAGAGGGCGCCAGTGCTCACTACTTTTTATAATTCTCAACTTCTTTTTCCAGACTCAGTTCGTA…
gRNA1target-LHA-attP-SA-T2A-miniGAL4-minipolyA-U6gRNA1-attP-RHA-gRNAtarget1
Acox57D_T2AmG4_2XgRNA	Acox57D		GTAGTACGATCATAACAACGCGGGATCGTGATAGCACTTGTGATATCTACGATTCCCTGCAATTGCAAATAAGCTAATTTTCTTATCAGCTTAAAGGGCTGCTCTACACCCCCAGGTGATAACGAATTCTGTAAAACGACGGCCAGTGGAGTAGTGCCCCAACTGGGGTAACCTTTGAGTTCTCTCAGTTGGGGGCGTAGGCCTGCAGGAGTCGATCCAACATGGCGACTTGTCCCATCCCCGGCATGTTTAAATATACTAATTATTCTTGAACTAATTTTAATCAACCGATTTATCTCTCTTCCGCAGTGGGAGGTTCCGGTGGAAGCGGAGGTAGCGGCGGATCCGAGGGCCGCGGCAGCCTGCTGACCTGCGGCGATGTGGAGGAGAACCCCGGGC…
CG3376_T2AmG4_2XgRNA	CG3376		GTAGTACGATCATAACAACGCGGTGTAATCAATCACATATTTTAAGCCATTAGATATTTAAAGCTATTTGATCGTCATTTCGCATTCTCAAAACATACTATTACTGCATAATAACAACCCCATGAATTCTGTAAAACGACGGCCAGTGGAGTAGTGCCCCAACTGGGGTAACCTTTGAGTTCTCTCAGTTGGGGGCGTAGGCCTGCAGGAGTCGATCCAACATGGCGACTTGTCCCATCCCCGGCATGTTTAAATATACTAATTATTCTTGAACTAATTTTAATCAACCGATTTATCTCTCTTCCGCAGGTCGGGAGGTTCCGGTGGAAGCGGAGGTAGCGGCGGATCCGAGGGCCGCGGCAGCCTGCTGACCTGCGGCGATGTGGAGGAGAACCCCGG…
CG5009_T2AmG4_2XgRNA	CG5009		GTAGTACGATCATAACAACGCGGGTGGGCCGGCGGCGAGGAGCGATTCAAGGAGAAGAAGGCCCTGGGTGAGTTAGCTTAGAAGGGAAAAACACCGGATTTCAAGCTTCTCCGGTGACCCCGAGAATTCTGTAAAACGACGGCCAGTGGAGTAGTGCCCCAACTGGGGTAACCTTTGAGTTCTCTCAGTTGGGGGCGTAGGCCTGCAGGAGTCGATCCAACATGGCGACTTGTCCCATCCCCGGCATGTTTAAATATACTAATTATTCTTGAACTAATTTTAATCAACCGATTTATCTCTCTTCCGCAGTGGGAGGTTCCGGTGGAAGCGGAGGTAGCGGCGGATCCGAGGGCCGCGGCAGCCTGCTGACCTGCGGCGATGTGGAGGAGAACCCCGGGC…
CG9527_T2AmG4_2XgRNA	CG9527		GTAGTACGATCATAACAACGCGGCGTTACCATTTCCAGTTTGTTACATATGTACATGGTCAGCGGGGTCGAAGTGCAGACTGCCTCGATAGCTTTTGTCGGAGCTGCAGGCCGCCAACCGCCCGAATTCTGTAAAACGACGGCCAGTGGAGTAGTGCCCCAACTGGGGTAACCTTTGAGTTCTCTCAGTTGGGGGCGTAGGCCTGCAGGAGTCGATCCAACATGGCGACTTGTCCCATCCCCGGCATGTTTAAATATACTAATTATTCTTGAACTAATTTTAATCAACCGATTTATCTCTCTTCCGCAGGTGGGAGGTTCCGGTGGAAGCGGAGGTAGCGGCGGATCCGAGGGCCGCGGCAGCCTGCTGACCTGCGGCGATGTGGAGGAGAACCCCGGG…
CG17544_T2AmG4_2XgRNA	CG17544		GTAGTACGATCATAACAACGCGGAGCGATTGCGACTGATATTCGAGAAGGAGCAGGGATTGCGAATTAAGGTAAGTGGATGGCTATCTCTTAGAAAGAGAACGTGCTGGAATATCTTCCAGCAGAATTCTGTAAAACGACGGCCAGTGGAGTAGTGCCCCAACTGGGGTAACCTTTGAGTTCTCTCAGTTGGGGGCGTAGGCCTGCAGGAGTCGATCCAACATGGCGACTTGTCCCATCCCCGGCATGTTTAAATATACTAATTATTCTTGAACTAATTTTAATCAACCGATTTATCTCTCTTCCGCAGGTGGGAGGTTCCGGTGGAAGCGGAGGTAGCGGCGGATCCGAGGGCCGCGGCAGCCTGCTGACCTGCGGCGATGTGGAGGAGAACCCCGGG…
Cp1_T2AmG4_2XgRNA	Cp1		GTAGTACGATCATAACAACGCGGCTTTCAATTCCCTTTATAGCTATCATTTGTTTAGCGTTCGTGCTATTTTCGTGCTGTGGCTGTGTCAATATGCGGGTCGGACTAACAAACAACCCCGAGCGAATTCTGTAAAACGACGGCCAGTGGAGTAGTGCCCCAACTGGGGTAACCTTTGAGTTCTCTCAGTTGGGGGCGTAGGCCTGCAGGAGTCGATCCAACATGGCGACTTGTCCCATCCCCGGCATGTTTAAATATACTAATTATTCTTGAACTAATTTTAATCAACCGATTTATCTCTCTTCCGCAGGTGGGAGGTTCCGGTGGAAGCGGAGGTAGCGGCGGATCCGAGGGCCGCGGCAGCCTGCTGACCTGCGGCGATGTGGAGGAGAACCCCGGG…
endoB_T2AmG4_2XgRNA	endoB		GTAGTACGATCATAACAACGCGGGTGAAGGAGGCGGGCAGCACAATATCACGAGTGGTGCAGGTGAACAAATCAATGAATTTGGGTGGCTGAAAAAAAAGCGGGTGGTGGTGAACTTTCGGTGGAATTCTGTAAAACGACGGCCAGTGGAGTAGTGCCCCAACTGGGGTAACCTTTGAGTTCTCTCAGTTGGGGGCGTAGGCCTGCAGGAGTCGATCCAACATGGCGACTTGTCCCATCCCCGGCATGTTTAAATATACTAATTATTCTTGAACTAATTTTAATCAACCGATTTATCTCTCTTCCGCAGGTGGGAGGTTCCGGTGGAAGCGGAGGTAGCGGCGGATCCGAGGGCCGCGGCAGCCTGCTGACCTGCGGCGATGTGGAGGAGAACCCCGGG…
khc_T2AmG4_2XgRNA	Khc		GTAGTACGATCATAACAACGCGGTTCTAGTTTCCAGTCCGCCTTCAGTGCTTACCTCACTTACATTTCCACACAAACACATACACACATTGACGGTAGCCCCCGCTCCACTTCCACTCCCCTGGAATTCTGTAAAACGACGGCCAGTGGAGTAGTGCCCCAACTGGGGTAACCTTTGAGTTCTCTCAGTTGGGGGCGTAGGCCTGCAGGAGTCGATCCAACATGGCGACTTGTCCCATCCCCGGCATGTTTAAATATACTAATTATTCTTGAACTAATTTTAATCAACCGATTTATCTCTCTTCCGCAGGTGGGAGGTTCCGGTGGAAGCGGAGGTAGCGGCGGATCCGAGGGCCGCGGCAGCCTGCTGACCTGCGGCGATGTGGAGGAGAACCCCGGG…
lst_T2AmG4_2XgRNA	Lst		GTAGTACGATCATAACAACGCGGCTCATCCGCTCATCCGCTCATCCGCAGCTCATCCGCAGCTCATCCATCCTGCTGGTGGAGCCTTGATACCGTTTACAAAGTCGAGCTCTCTTAACCCTGAGAATTCTGTAAAACGACGGCCAGTGGAGTAGTGCCCCAACTGGGGTAACCTTTGAGTTCTCTCAGTTGGGGGCGTAGGCCTGCAGGAGTCGATCCAACATGGCGACTTGTCCCATCCCCGGCATGTTTAAATATACTAATTATTCTTGAACTAATTTTAATCAACCGATTTATCTCTCTTCCGCAGGTGGGAGGTTCCGGTGGAAGCGGAGGTAGCGGCGGATCCGAGGGCCGCGGCAGCCTGCTGACCTGCGGCGATGTGGAGGAGAACCCCGGG…
Nlaz_T2AmG4_2XgRNA	Nlaz		GTAGTACGATCATAACAACGCGGTGTTAAGCTACTGGACACCTTCGACGCGGAAGCGGTGAGTTCTGACCTTAGGCCAACCATCTCGCATCGCATGTTAATCATGTCATTCTGATAGATTTAGGAATTCTGTAAAACGACGGCCAGTGGAGTAGTGCCCCAACTGGGGTAACCTTTGAGTTCTCTCAGTTGGGGGCGTAGGCCTGCAGGAGTCGATCCAACATGGCGACTTGTCCCATCCCCGGCATGTTTAAATATACTAATTATTCTTGAACTAATTTTAATCAACCGATTTATCTCTCTTCCGCAGGTGGGAGGTTCCGGTGGAAGCGGAGGTAGCGGCGGATCCGAGGGCCGCGGCAGCCTGCTGACCTGCGGCGATGTGGAGGAGAACCCCGGG…
int-100
CG5009_int_100_2XgRNA1	CG5009		GTAGTACGATCATAACAACGCGGGTGGGCCGGCGGCGAGGAGCGATTCAAGGAGAAGAAGGCCCTGGGTGAGTTAGCTTAGAAGGGAAAAACACCGGATTTCAAGCTTCTCCGGTGACCCCGAAAACTTGTCTTCATTATATAGAAGACTTCGCGCAGACCTACATGTACATTCACATTAACCGGTCGCTCAGAGCTTTATCTGAGCTTGGCGCAATCGCGTTTCCCAACAGTGGATGCAAGAAATTGTGCCAAACCGCGTTGTTATGATCGTACTAC
CG9527_int100_2XgRNA1	CG9527		GTAGTACGATCATAACAACGCGGCGTTACCATTTCCAGTTTGTTACATATGTACATGGTCAGCGGGGTCGAAGTGCAGACTGCCTCGATAGCTTTTGTCGGAGCTGCAGGCCGCCAACCGCCCAAACTTGTCTTCATTATATAGAAGACTTCGCGGGTCTAATCGTCGCCCGTTTCTTATCTGCACACTTGAGTAATTCGTTTACATGTCACTCCGTCTTTAGCACAAGGTGTGGCAATGGATGGAACAGCACCCCCGCGTTGTTATGATCGTACTAC
Cp1_int100_2XgRNA1	Cp1		GTAGTACGATCATAACAACGCGGCTTTCAATTCCCTTTATAGCTATCATTTGTTTAGCGTTCGTGCTATTTTCGTGCTGTGGCTGTGTCAATATGCGGGTCGGACTAACAAACAACCCCGAGCAAACTTGTCTTCATTATATAGAAGACTTCGCGTGGGAGAGGAGGTCTCTTATCCACGGGACCACTGCAGGCAGATGGAGCGCATTTCCTCGTGCTGGCCTCGCTTCTCCTATTCCTACCTGCAGTTTGGCTCCCGCGTTGTTATGATCGTACTAC
endoB_int100_2XgRNA1	endoB		GTAGTACGATCATAACAACGCGGGTGAAGGAGGCGGGCAGCACAATATCACGAGTGGTGCAGGTGAACAAATCAATGAATTTGGGTGGCTGAAAAAAAAGCGGGTGGTGGTGAACTTTCGGTGAAACTTGTCTTCATTATATAGAAGACTTCGCGGTTGGGCAAATGACAGATGTACCCCAAACCAATCTCAAGCACTTTCGTTGTTTCTTTGCCCTTTTCAACGGCTCTCCATTGTTTTCAATGACCTTTTCAGCCGCGTTGTTATGATCGTACTAC
khc_int100_2XgRNA1.dna	Khc		GTAGTACGATCATAACAACGCGGTTCTAGTTTCCAGTCCGCCTTCAGTGCTTACCTCACTTACATTTCCACACAAACACATACACACATTGACGGTAGCCCCCGCTCCACTTCCACTCCCCTGAAACTTGTCTTCATTATATAGAAGACTTCGCGTCCGCGCGCCAATGAGTCATGCACGCAAAGCATACAAAAAAAAAAAATATGAGGAAAAACAATAAGAGCAACTTTGGAGGCAATGGAATTTGGCTGTATTCCGCGTTGTTATGATCGTACTAC
Lst_int100_2XgRNA1	Lst		GTAGTACGATCATAACAACGCGGCTCATCCGCTCATCCGCTCATCCGCAGCTCATCCGCAGCTCATCCATCCTGCTGGTGGAGCCTTGATACCGTTTACAAAGTCGAGCTCTCTTAACCCTGAAAACTTGTCTTCATTATATAGAAGACTTCGCGACCACATGAAACGCAACCGGTTACAGTCTCCACCTCGATCTCGATCTTCTCCTTTTGCCCCGCCGCCGATTGTAATTAATTTGTTTTTGACTGCGGTTAACCGCGTTGTTATGATCGTACTAC
NLaz_int100_2XgRNA1	Nlaz		GTAGTACGATCATAACAACGCGGTGTTAAGCTACTGGACACCTTCGACGCGGAAGCGGTGAGTTCTGACCTTAGGCCAACCATCTCGCATCGCATGTTAATCATGTCATTCTGATAGATTTAGAAACTTGTCTTCATTATATAGAAGACTTCGCGAATAGGAAAGTCTAAACGATCAGTTGCAAGCGAACATGCCAATAAAGGCACTTCAAAGTCTCAATAGTTATGAACTAAAATTTAAATATAAGGGTATATACCGCGTTGTTATGATCGTACTAC
