# Supplementary figures and images for: An efficient CRISPR-based strategy to insert small and large fragments of DNA using short homology arms
Source: eLife journal article supplement (doi:10.7554/elife.51539), 2019-11-01

Kanca et al. Figure S1. FACS data of control cells (left) and ssDNA knock-in cells (right).

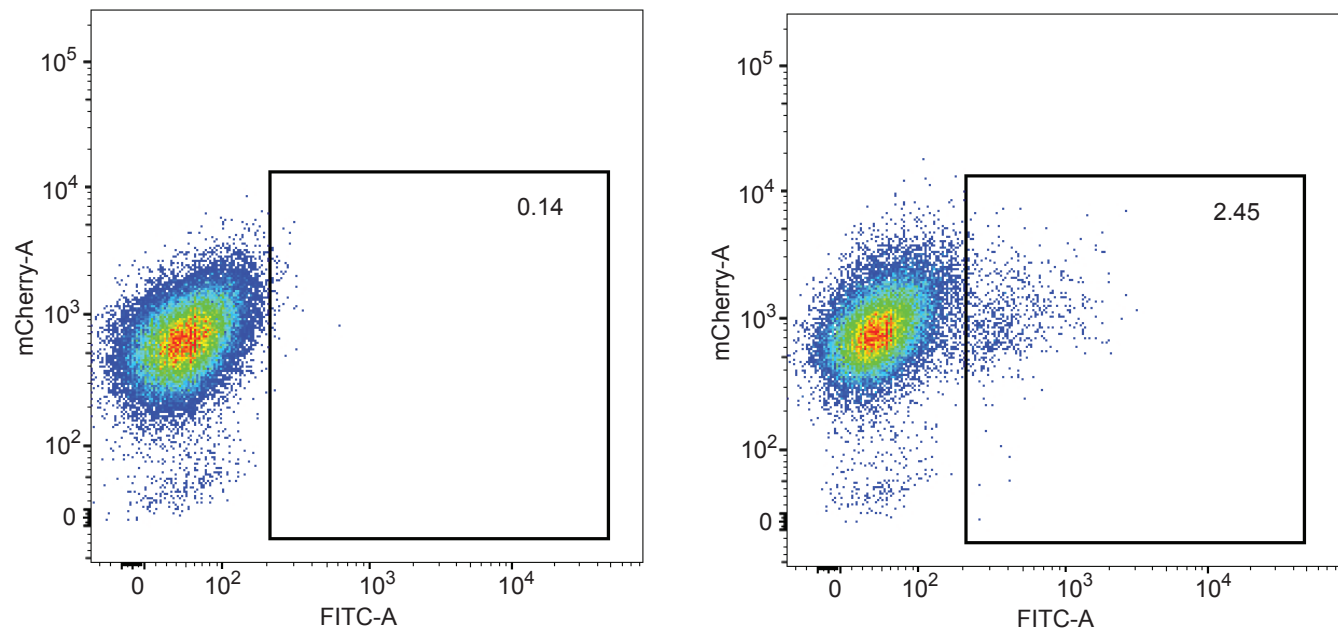

Supplement: supp [file elife-51539-supp-v1.zip › elife_poa_e51539_Figure_2_figure_supplement_1.pdf]

Kanca et al. Figure S2. Detection of subcellular localization of GFP tagged proteins in S2 cells

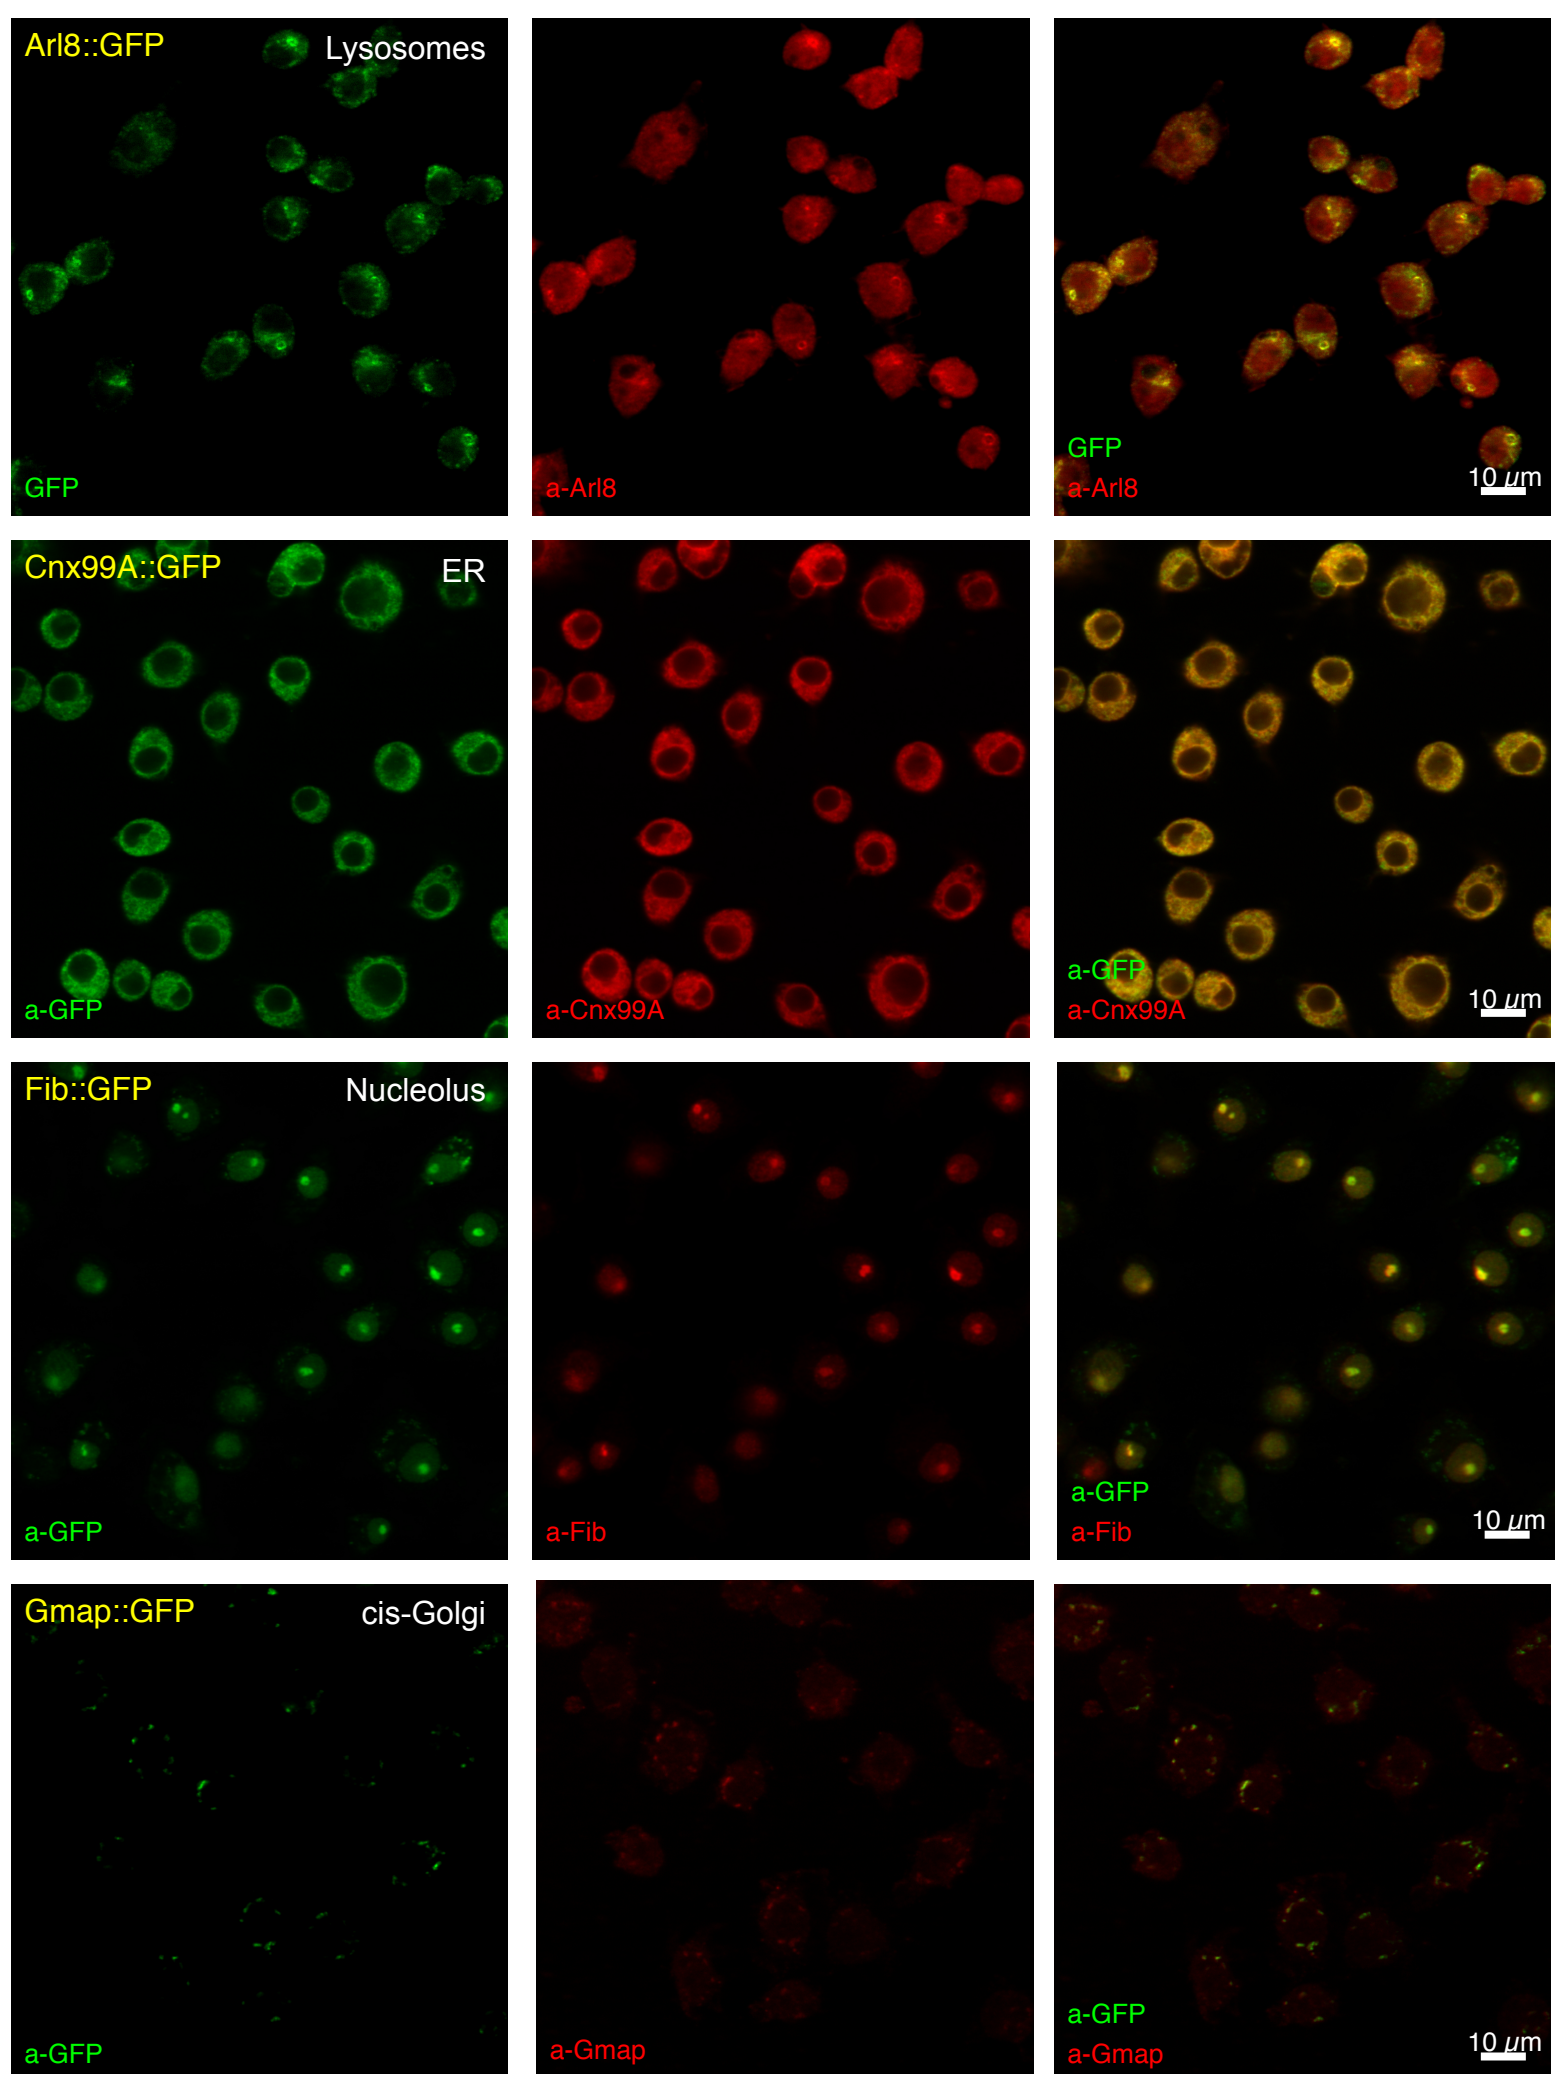

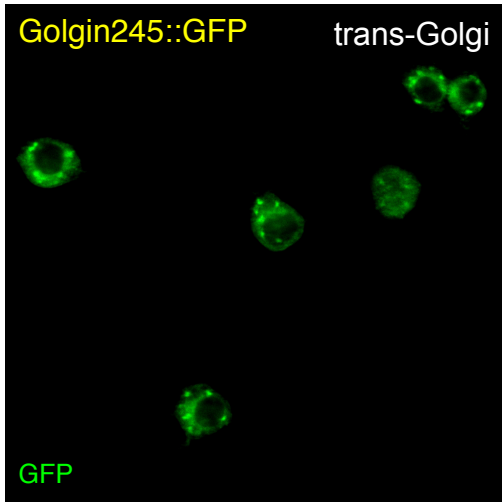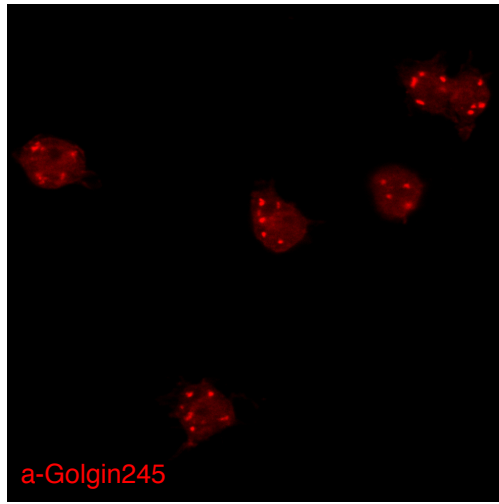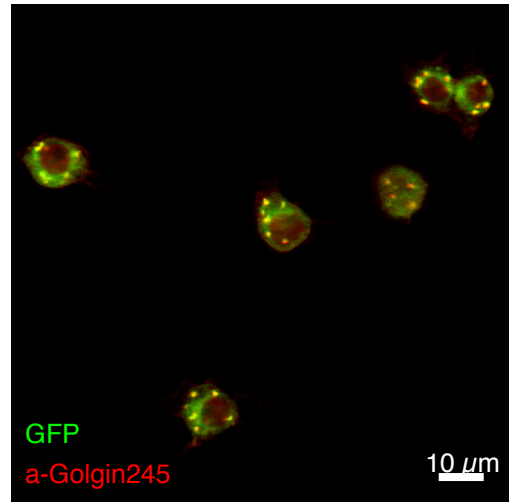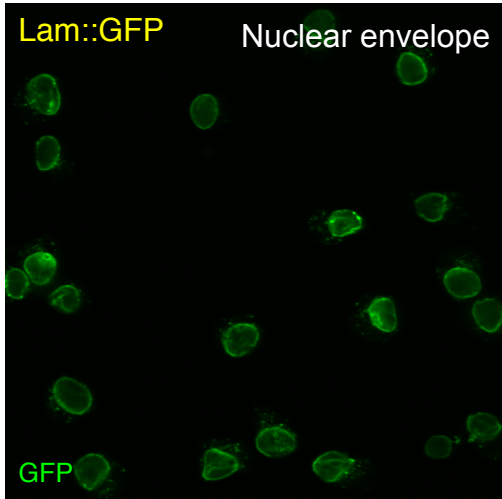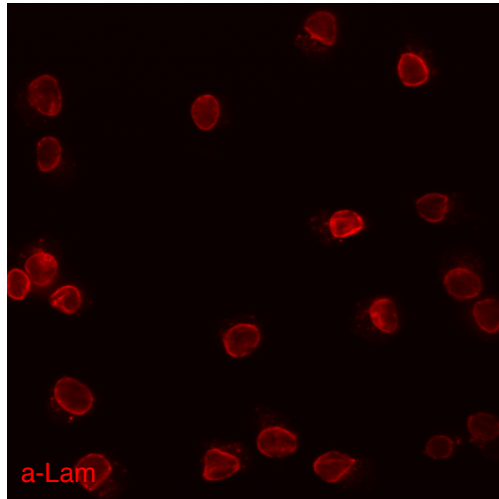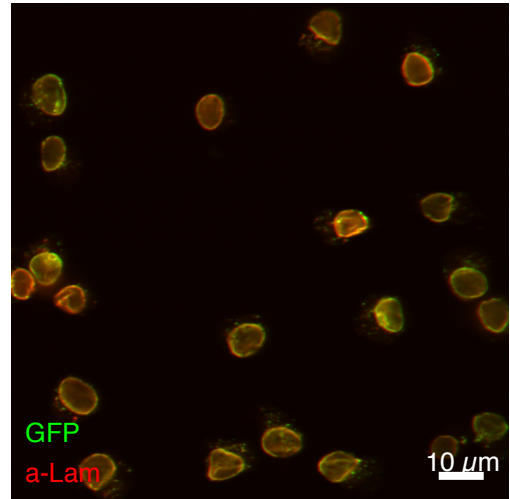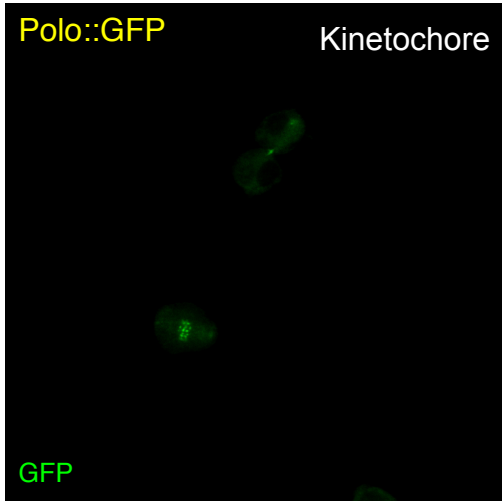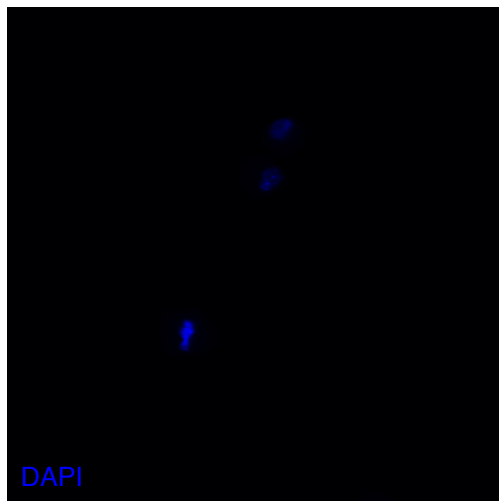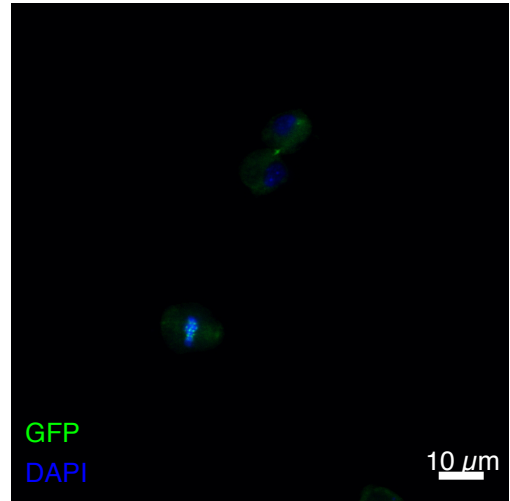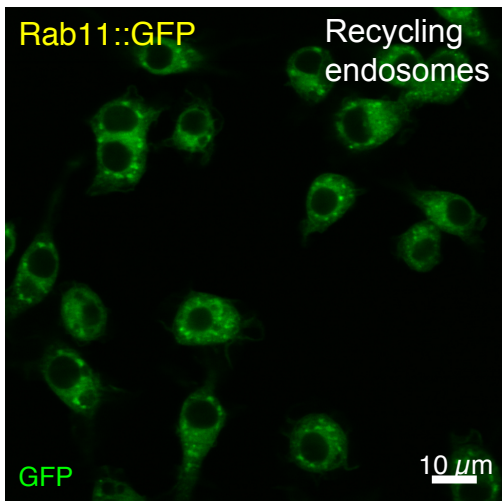

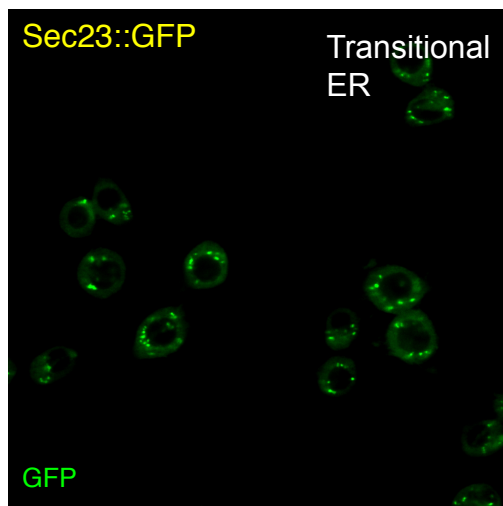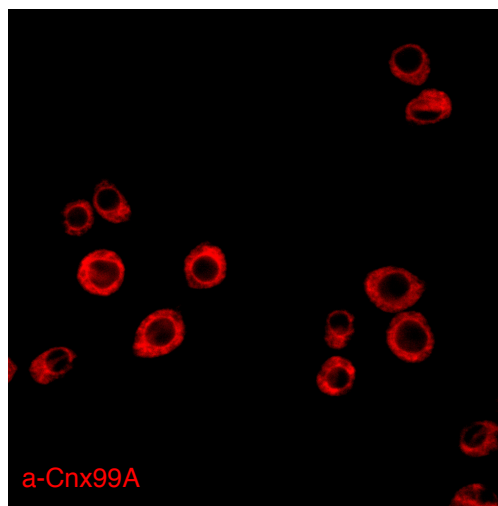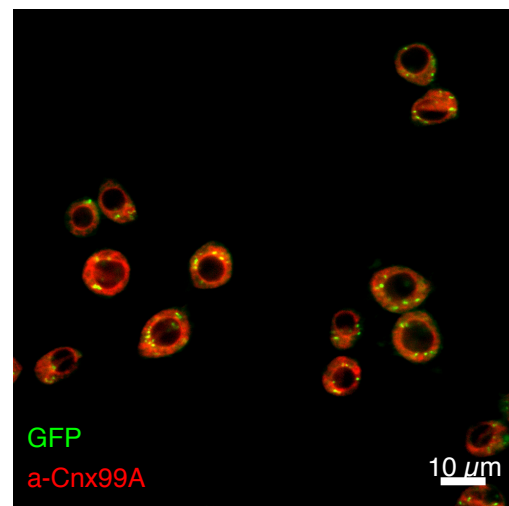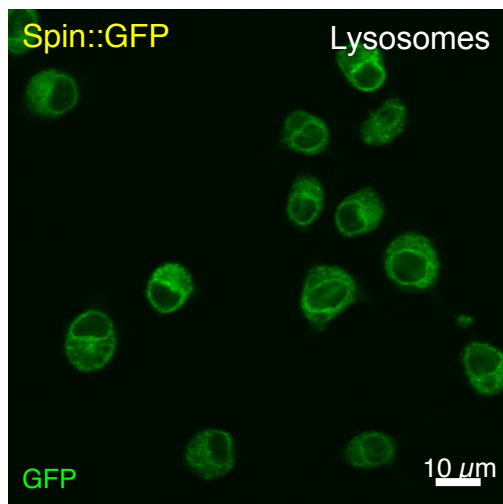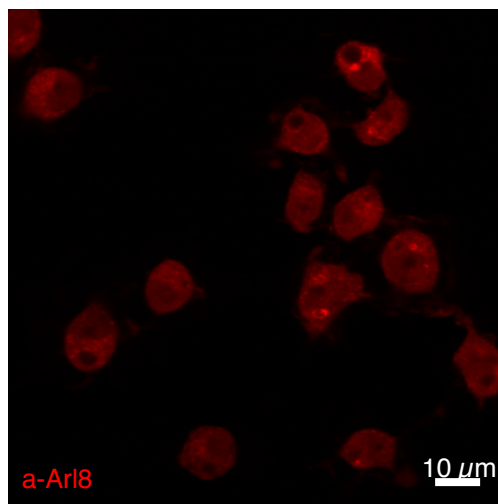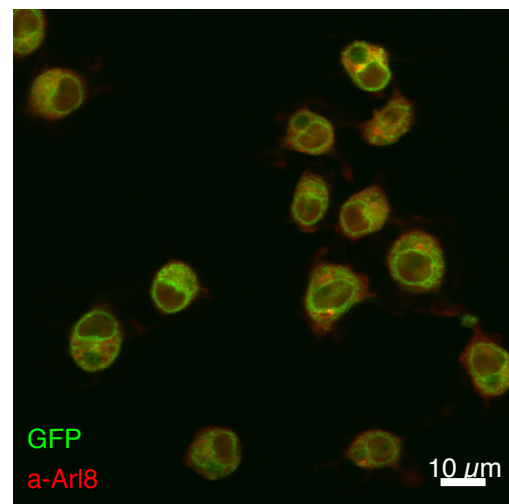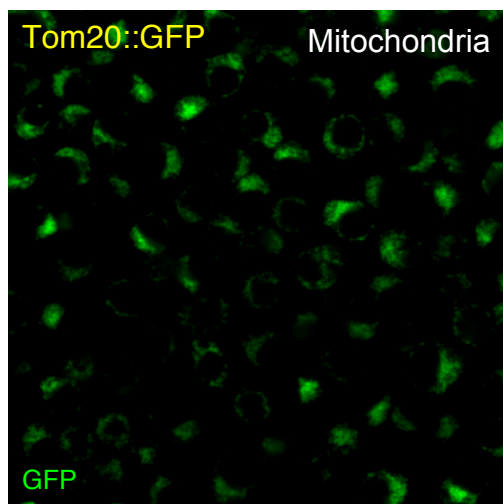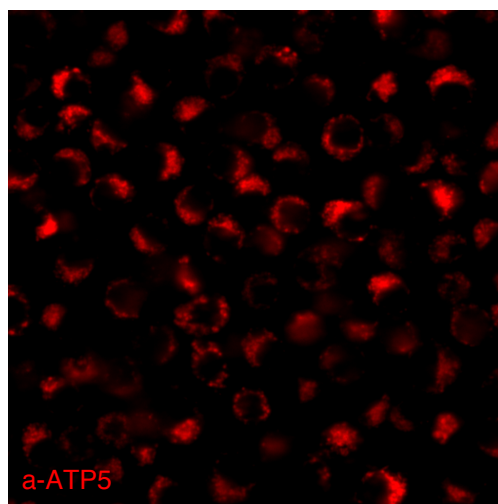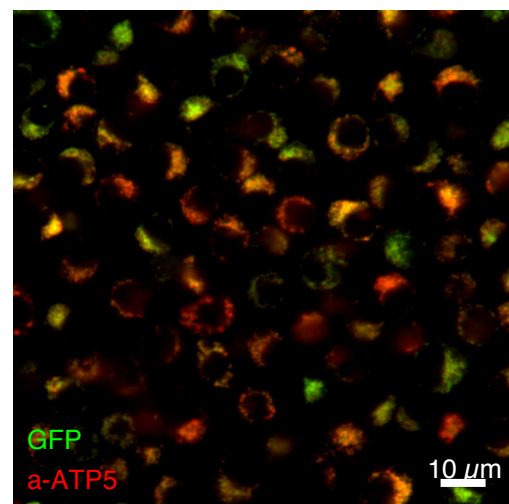

Supplement: supp [file elife-51539-supp-v1.zip › elife_poa_e51539_Figure_2_figure_supplement_2.pdf]

Kanca et al. Figure S3. Western blot analysis of tagged proteins observed in S2R+ cells.

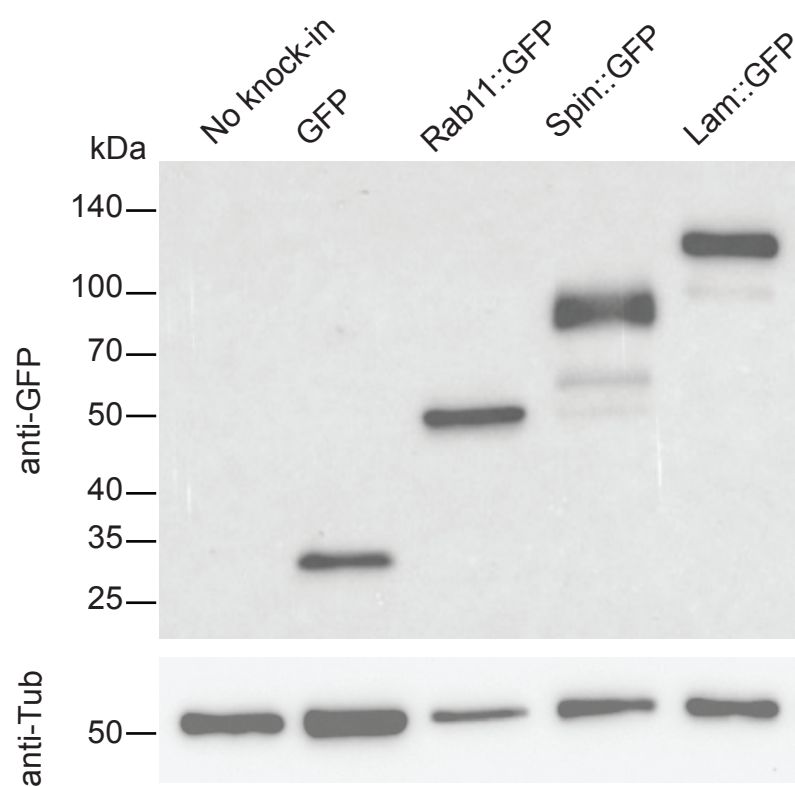

Supplement: supp [file elife-51539-supp-v1.zip › elife_poa_e51539_Figure_2_figure_supplement_3.pdf]
